# Supplementary material for: Recessive mutations in muscle-specific isoforms of FXR1 cause congenital multi-minicore myopathy
Source: PubMed Central journal article supplement (PMC6377633; doi:10.1038/s41467-019-08548-9), 2019-02-15
Supplement: 41467_2019_8548_MOESM2_ESM.pdf [file 41467_2019_8548_MOESM2_ESM.pdf]

## **SUPPLEMENTARY INFORMATION**

### **RECESSIVE MUTATIONS IN MUSCLE-SPECIFIC ISOFORMS OF FXR1 CAUSE CONGENITAL MULTI-MINICORE MYOPATHY**

**María Cristina Estañ, Elisa Fernández-Núñez et al.**

# Supplementary Figures

## Supplementary Figure 1

a

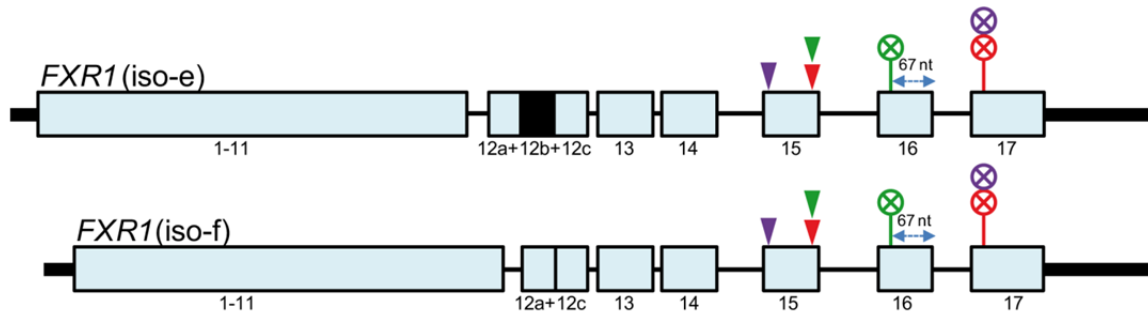

b

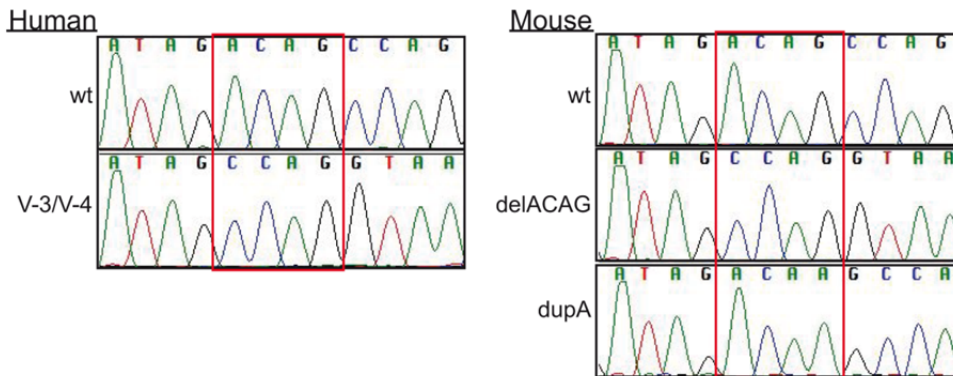

c

| <i>FXR1</i> isoforms (iso) | accession number    | mutation           | protein effect   | number of residues | position of stop codon | predicted MW (kDa) |
|----------------------------|---------------------|--------------------|------------------|--------------------|------------------------|--------------------|
| human iso-e WT             | XM_005247813.3      | -                  | -                | 677                | exon 17                | 76.19              |
| human iso-f WT             | XM_005247815.3      | -                  | -                | 648                | exon 17                | 73.12              |
| family 1                   | human iso-e delACAG | c.1764_1767delACAG | p.Arg588Serfs*37 | 623                | exon 17                | 70.60              |
|                            | human iso-f delACAG | c.1677_1680delACAG | p.Arg559Serfs*37 | 594                | exon 17                | 67.58              |
| family 2                   | human iso-e delA    | c.1707delA         | p.Lys569Asnfs*57 | 624                | exon 17                | 70.15              |
|                            | human iso-f delA    | c.1620delA         | p.Lys540Asnfs*57 | 595                | exon 17                | 67.08              |
| mouse iso-e WT             | NM_001113188.1      | -                  | -                | 677                | exon 17                | 76.22              |
| mouse iso-f WT             | XM_006535401.1      | -                  | -                | 648                | exon 17                | 73.12              |
| mouse iso-e delACAG        | NM_001113188.1      | c.1764_1767delACAG | p.Arg588Serfs*37 | 623                | exon 17                | 70.71              |
| mouse iso-f delACAG        | XM_006535401.1      | c.1677_1680delACAG | p.Arg559Serfs*37 | 594                | exon 17                | 67.61              |
| mouse iso-e dupA           | NM_001113188.1      | c.1766dupA         | p.Pro590Alafs*10 | 598                | exon 16                | 67.73              |
| mouse iso-f dupA           | XM_006535401.1      | c.1679dupA         | p.Pro561Alafs*10 | 569                | exon 16                | 64.63              |

d

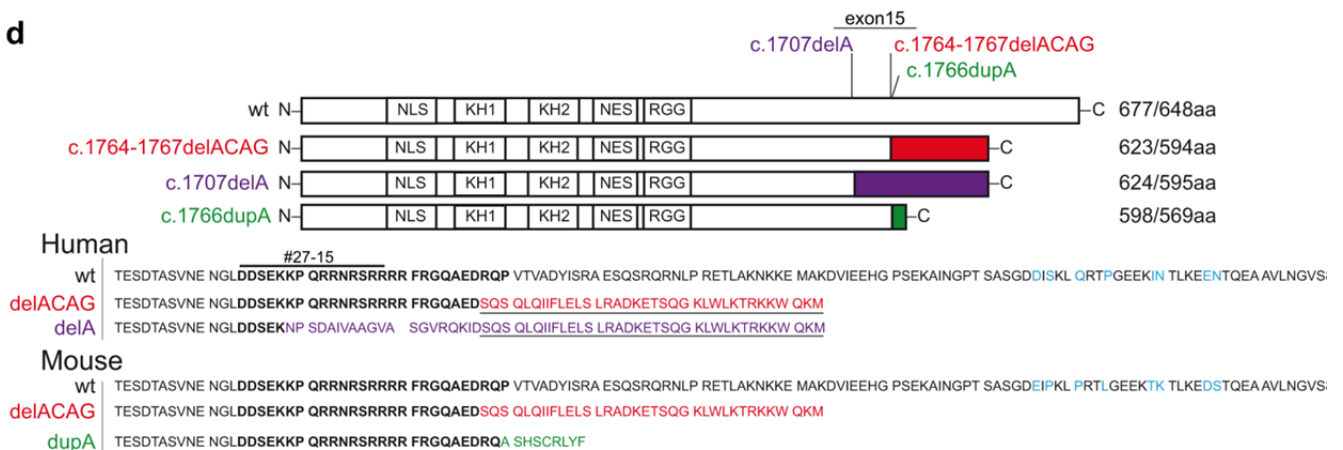

**Supplementary Figure 1. Mutation description in patients and mice.** a) Schematic representation of exons 12-17 (independent boxes) of *FXR1* iso-e and iso-f encoding P82,84. The central part of exon-12 (black box: 12b) is spliced out in iso-f. Exon structure of *FXR1* P70-80 isoforms is in Dube et al<sup>1</sup> and Kirpatrick et al<sup>2</sup>. Exon-15 frameshift variants are indicated by purple (delA), red (delACAG) and green (dupA) arrowheads and corresponding premature termination codons (PTC) generated by these mutations are shown with encircled crosses in identical colour. DelA and delACAG share the same PTC at the 5'-end of the terminal exon-17. DupA PTC is 67 nucleotides (nt) upstream of the last exon-exon junction and thus it elicits NMD<sup>3</sup>. b) DNA-sequencing chromatograms from a normal control (wt) and patients of family 1 (V-3 and V-4) containing the homozygous ACAG nucleotide deletion (squared in red) are shown next to equivalent exon-15 mouse sequence from wt, delACAG and dupA homozygotes. The single adenine duplicated in dupA mice is comprised within the four nucleotides deleted in delACAG mutants. c) Description of mutations from patients and mice showing iso-e/f reference sequences, mutation position, protein effect, total number of residues, position of PTCs and molecular weight of predicted mutant proteins. d) Upper panel: schematic representation of normal (wt) and mutant proteins showing localization of mutations, functional domains as described by Dube et al<sup>1</sup> and effect on the protein of each mutation. The delACAG (family 1 and delACAG mice), delA (family2) and dupA (dupA mice) variants cause the replacement of the last 90, 109 and 88 C-terminal amino acids of normal P82,84 by 36 (red box), 56 (purple box) and 9 (green box) new residues respectively. Bottom panel: amino acid sequence alignment of the C-terminal end of wt and mutant iso-e/f from humans and mice. New residues incorporated due to delACAG, delA or dupA mutations are in red, purple and green respectively. Blue letters designate non-identical amino acids between human and mouse. Exon-15 amino acids are in bold. DelACAG and delA proteins share their last 37 residues (underlined amino acids). The peptide used to raise the #27-15 antibody is indicated<sup>1</sup>.

## Supplementary Figure 2

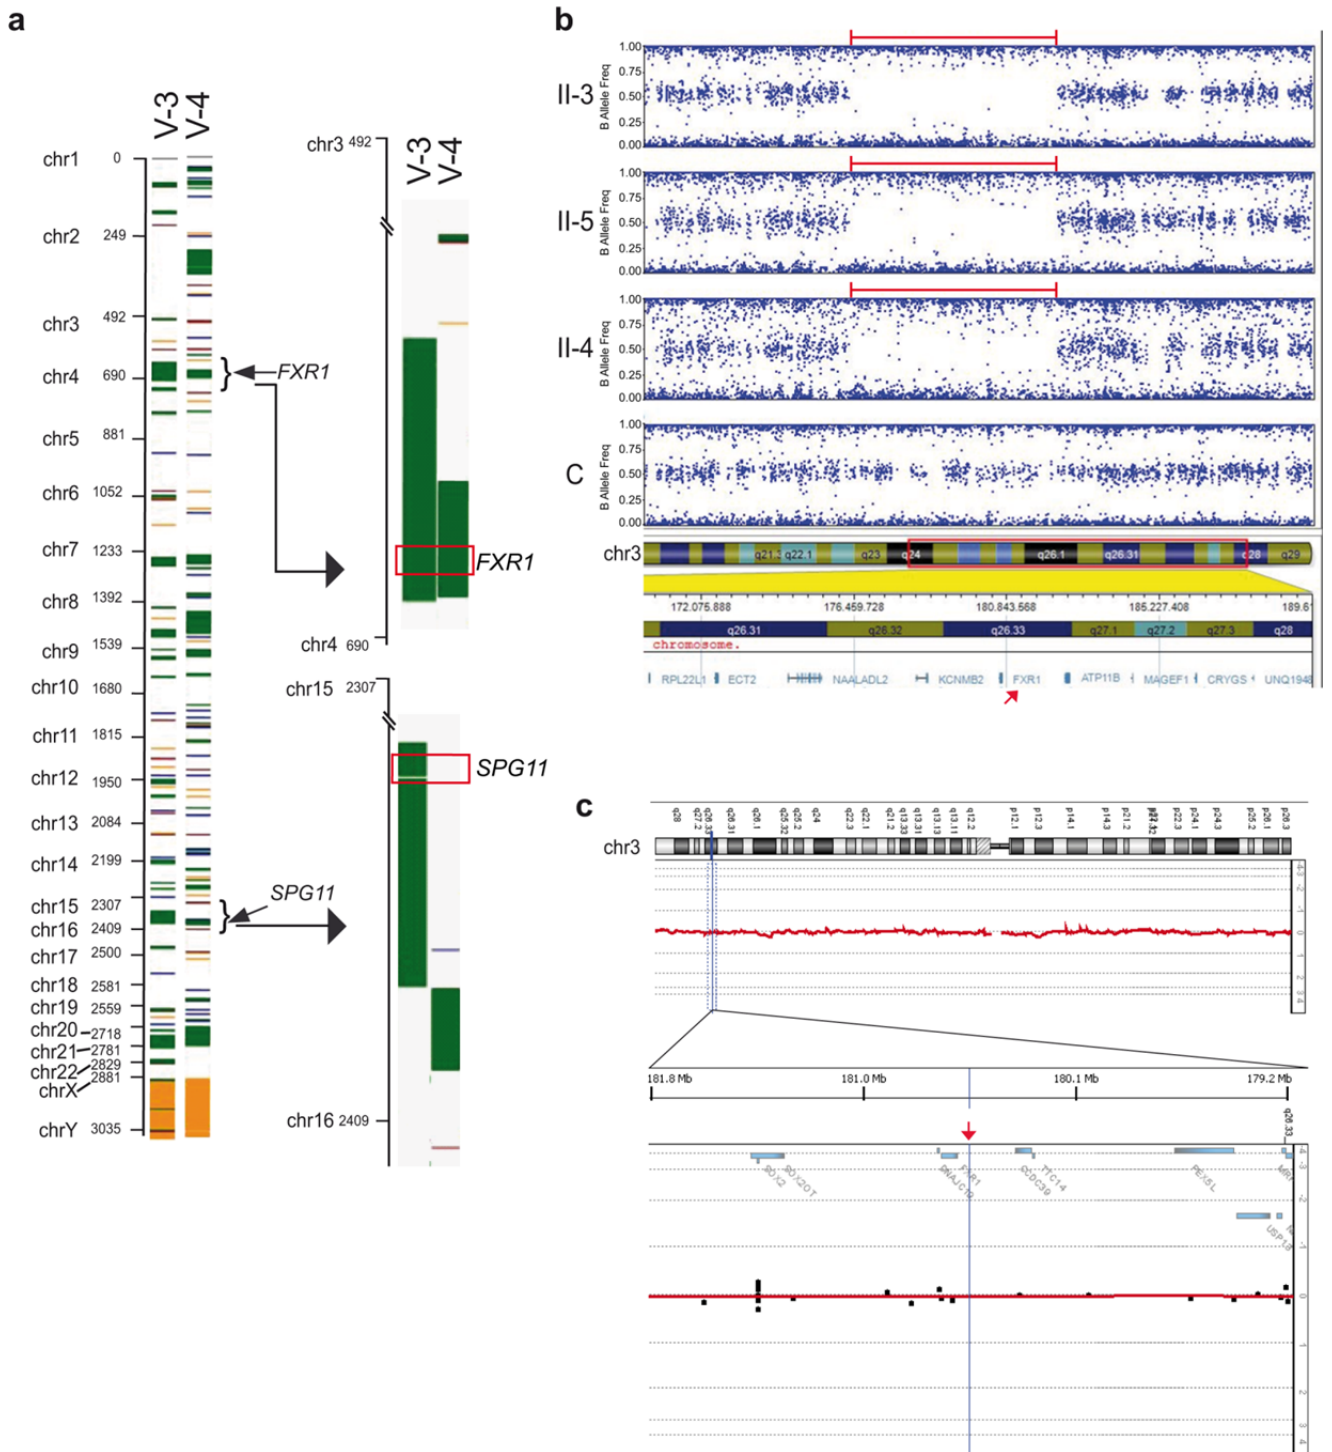

**Supplementary Figure 2. SNP-arrays and aCGH in families 1 and 2.** a) SNP-array hybridization of the proband (V-3) and affected fetus (V-4) of family 1 showing *FXR1* within large regions of homozygosity (ROH; green boxes) in V-3 (54.6 Mb) and V-4 (23.7 Mb) on chromosome 3. *SPG11* (chromosome 15, Supplementary Table 1b) is not within a ROH in V-4. b) B-allele frequency obtained by whole genome SNP-array hybridization in the three affected siblings of family 2 (II-3-4-5) and a control individual (C) revealing a common region of homozygosity of 5.98 Mb on chromosome 3 (red lines) comprising *FXR1* (red arrow) in the tree patients. B-allele plots correspond to a fragment of chromosome 3 spanning from q26.31 to q28. Images in a-b were obtained with GenomeStudio software (Illumina). c) aCGH (60,000 probes) for chromosome 3 corresponding to one of the patients of family 2 demonstrating no heterozygous deletion in the region encompassing *FXR1*. Images were obtained with Workbench Standard Edition 5.0 software (Agilent Technologies).



### Supplementary Figure 3

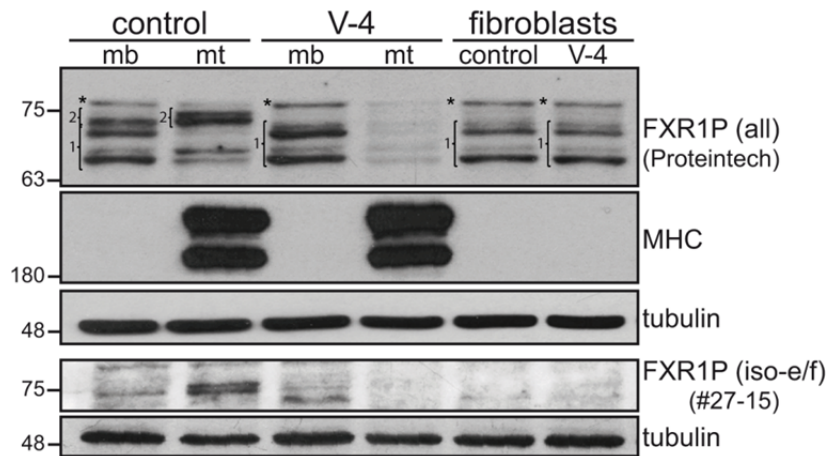

**Supplementary Figure 3. FXR1P expression in V-4 primary cells.** Representative immunoblot showing expression of FXR1P isoforms in the soluble fraction (SF) of protein extracts from control and V-4 myoblasts (mb), myotubes (mt) and fibroblasts. Numbered brackets indicate P70-80 (1) and P82,84 (2) isoforms. Note absence of P82,84 in the SF of V-4 cells. No variations in the levels of FXR1P isoforms were detected between control and V-4 fibroblasts. An antibody detecting all FXR1P isoforms (Proteintech) was used in the upper panel and another one specific for FXR1P isoforms e/f (#27-15) was used in the lower panel. MHC and tubulin served as controls for myotube differentiation and protein loading respectively. Asterisks denote a non-specific band. n=3.

Supplementary Figure 4

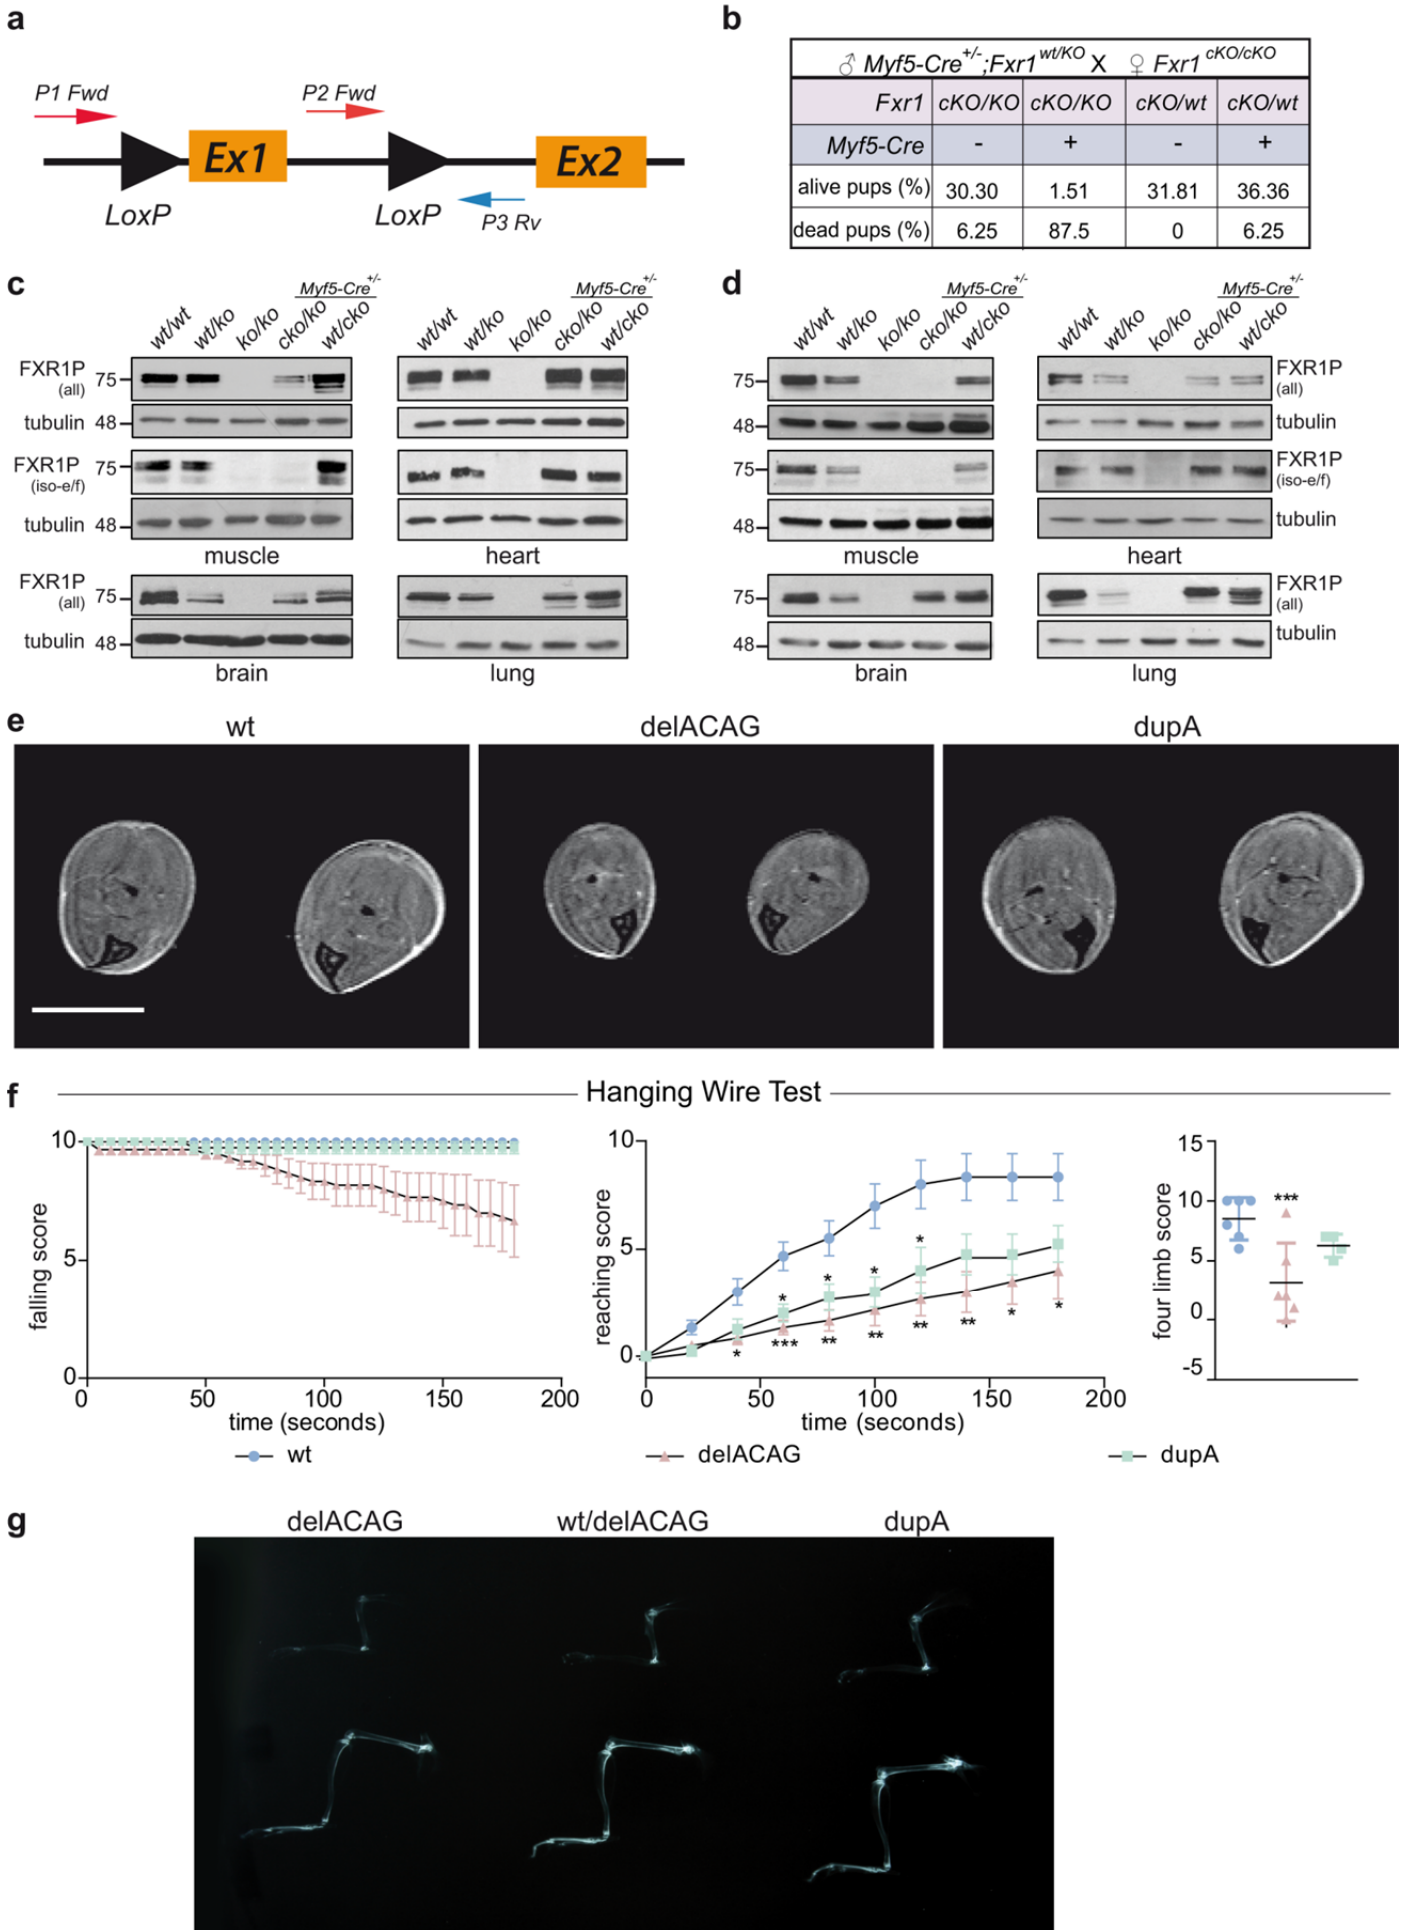

**Supplementary Figure 4. Phenotypes of *Fxr1*-conditional knockouts and exon-15 mutant mice.** a) Schematic representation of *Fxr1* floxed allele. Exon-1 is flanked by two *LoxP* sites and the primers used for genotyping (P1-P3 and P2-P3) are indicated. P1-P3 yielded a PCR product only after Cre-mediated excision of exon-1 (ko allele), while positive product amplification using P2-P3 occurred in wt and non Cre-recombined alleles (cko). PCR products from wt and cko alleles differed in size due to *LoxP*. b) Relative frequency of each genotype respecting the total number of surviving pups or the total number of dead pups at P0-1 (n=82) from crosses between *Fxr1*<sup>cko/cko</sup> females and *Myf5-Cre*<sup>+/-</sup>;*Fxr1*<sup>wt/ko</sup> males. Presence or absence of *Myf5-Cre* is indicated with + and – symbols. c) Representative immunoblots using an anti-FXR1P antibody against all FXR1P isoforms (#ML13 antibody); or specific for isoforms e and f (#27-17 antibody) in skeletal muscle, heart, brain and lung protein extracts from E18.5 *Fxr1* conditional embryos (cko/ko or wt/cko) heterozygous for *Myf5-Cre* (*Myf5-Cre*<sup>+/-</sup>). Tissue extracts from wild type (wt/wt), homozygous (ko/ko) and heterozygous (wt/ko) E18.5 embryos for a constitutive *Fxr1* null allele (exon-1 deleted) were included as controls. d) Same as c but using protein extracts from independent embryos. n=4. e) Representative image of a specific hindlimb MRI slice (three slices below the tibial plateau) from wt, delACAG and dupA mice illustrating differences in muscle mass. n= 4(wt), 9(delACAG), 4(dupA) mice. Scale bar 5 mm. f) From left to right: falling, reaching and four limb scoring graphs corresponding to the hanging wire test showing deficient performance in delACAG and intermediate results in dupA mice. Note that although the falling score was not statistical significant, delACAG mutants had lower values than wt and dupA mice. n= 6(wt), 6(delACAG), 4(dupA) mice. Graphs indicate mean ± s.e.m.(falling and reaching test) or mean ± s.d. (four limb score) followed by one-way ANOVA with Tukey post-hoc test. g) X-rays of left fore- and hind-limbs from delACAG, wt/delACAG and dupA mice taken simultaneously. n= 4(wt), 1(wt/delACAG), 8(delACAG), 4 (dupA) mice.

Supplementary Figure 5

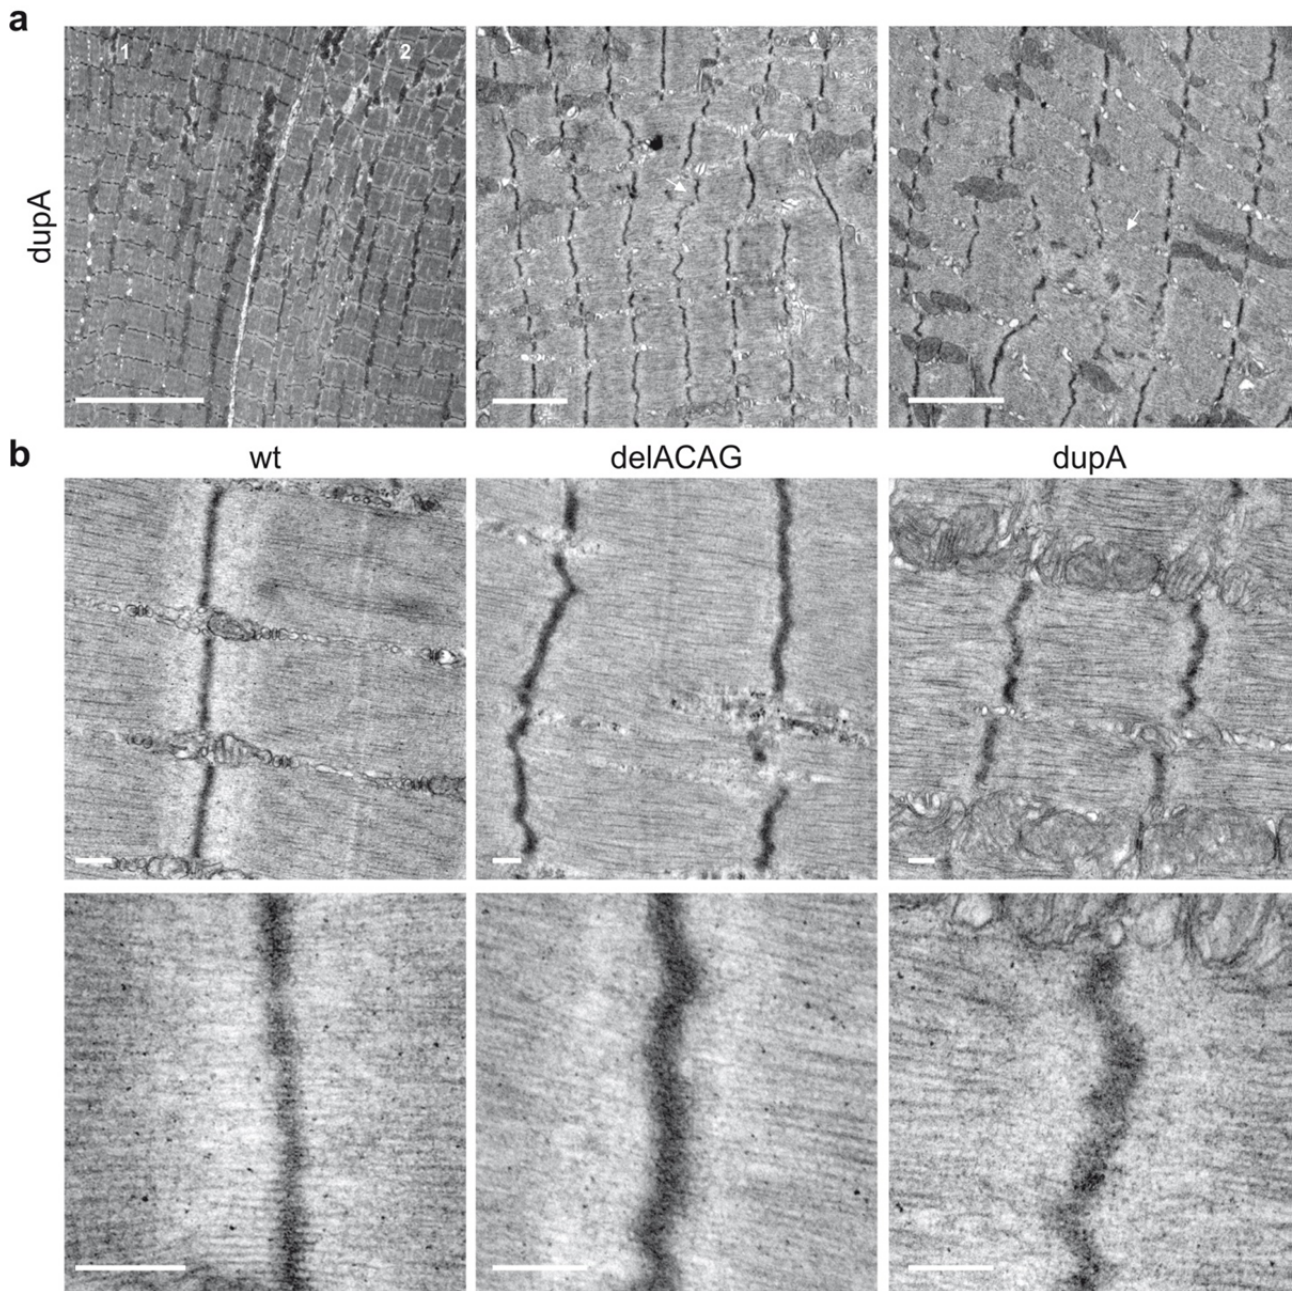

**Supplementary Figure 5. TEM analysis of myofibers from exon-15 mutant mice.** a) Representative TEM images of fibres from gastrocnemius of dupA mice. Numbers indicate different fibres and arrows point to areas of Z-streaming. Scale bars: 10 μm left panel, 2 μm middle and right panel. b) High magnification TEM images of gastrocnemius fibres demonstrating zigzagging, shortening and broadening of Z-bands in delACAG and dupA mutants compared to wt mice. Scale bars 200 nm. n= 3(wt), 4(delACAG), 2(dupA) mice.

### Supplementary Figure 6

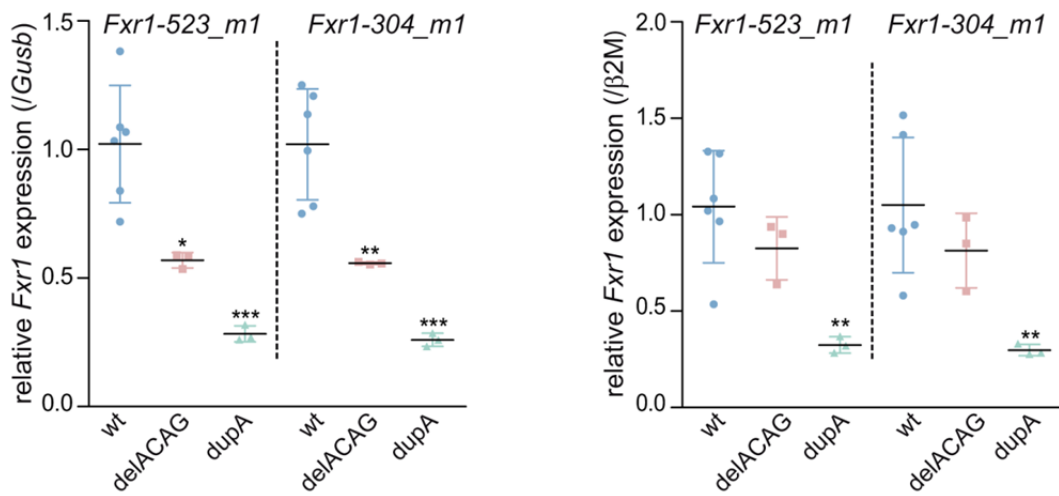

**Supplementary Figure 6. qRT-PCR analysis of P82,84 mRNA levels in exon-15 mutant mice.** Relative *Fxr1* expression using two different TaqMan expression assays in gastrocnemius of wt, delACAG and dupA mice at age 2.5 months. *Fxr1-523\_m1* (exons 2-3; Mm00484523\_m1) and *Fxr1-304\_m1* (exons 14-15; Mm01286304\_m1). Values are normalized to *Gusb* (left graph) or  $\beta 2M$  (right graph) mRNA levels and expressed as fold change of the mean value of wt mice. n= 6(wt), 3(delACAG) and 3(dupA) mice. Graphs are mean  $\pm$  s.d. followed by one-way ANOVA with Tukey post-hoc test.



Supplementary Figure 7

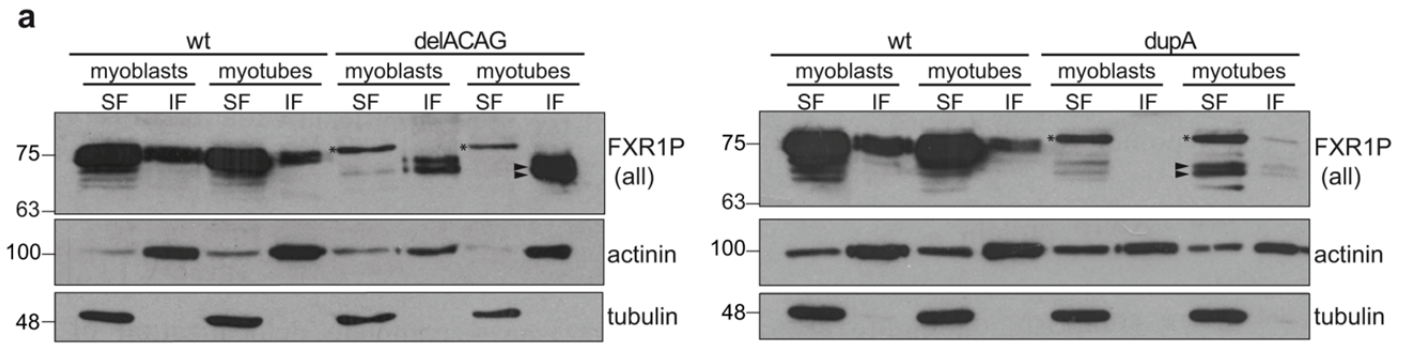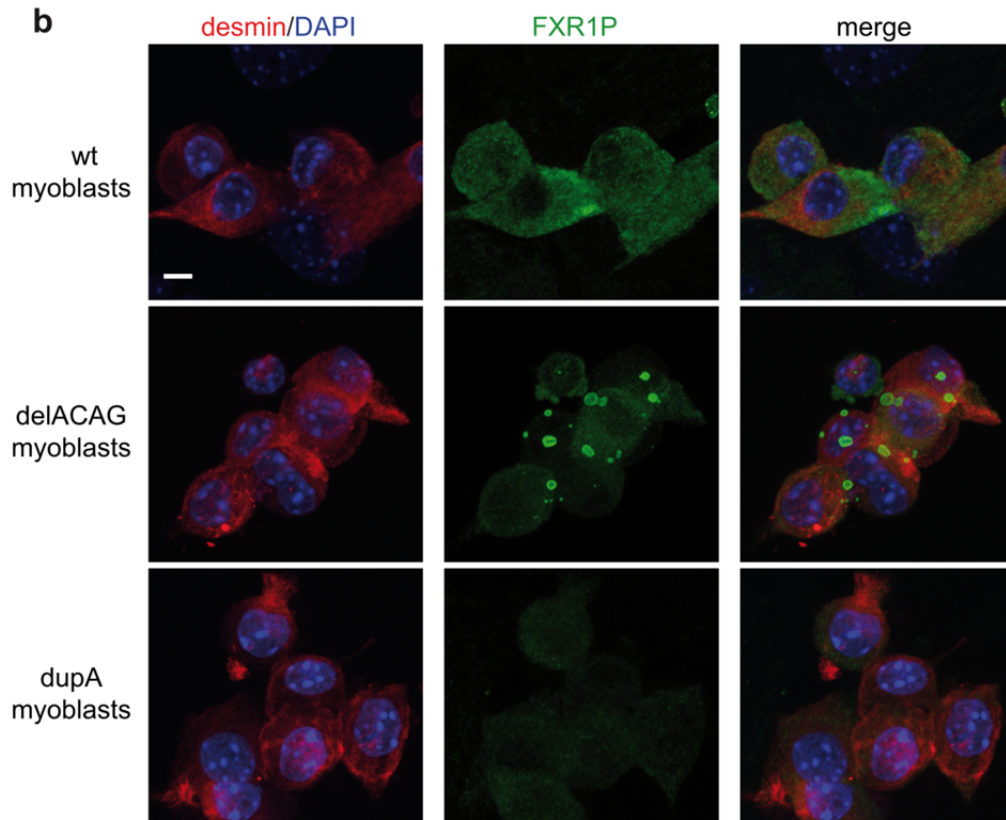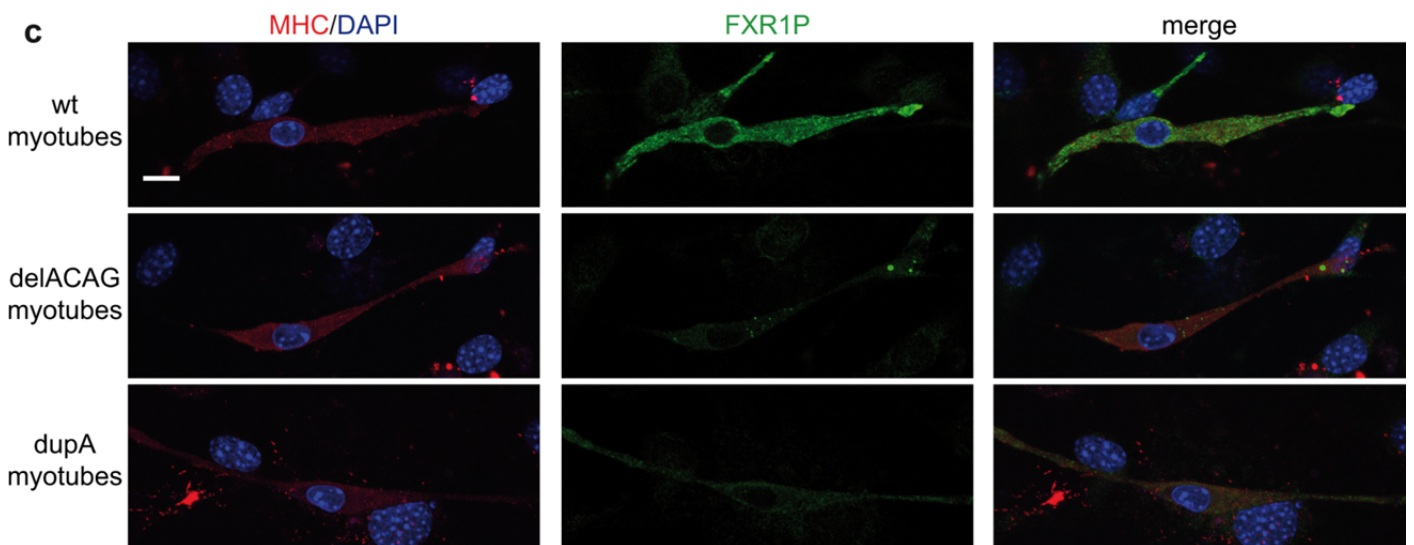



**Supplementary Figure 7. FXR1P expression in primary myogenic cells from mutant mice.** a) Representative WB of soluble (SF) and insoluble (IF) fractions from primary proliferating myoblasts and differentiated myotubes derived from wt, delACAG (left panel) and dupA (right panel) mice. Mutant P82,84 variants are indicated by arrowheads. DupA P82,84 variants were in the SF of cell extracts although, as in muscle tissue, required a long time of exposure to be detected. DelACAG P82,84 isoforms were in the IF of cell lysates. A number of 3 (left panel) and 2 (right panel) technical replicates of this experiment were performed using cells derived from 3(wt), 3(delACAG) and 1(dupA) mice. Asterisks denote a non-specific band. b-c) Confocal immunofluorescence analysis (Z-Project) of FXR1P in cultured myoblasts (b) and myotubes (c) from wt, delACAG and dupA mice showing ring-shaped FXR1P granules exclusively in delACAG cells since the myoblast stage. Note the reduction in FXR1P staining in dupA cells consistent with low protein levels of their corresponding P82,84 variants. Desmin and MHC expression was used as myogenic markers, with MHC being an indicator of myotube differentiation. Nuclei were labelled with DAPI. Primary myoblast cultures from n= 4(wt), 4(delACAG), 2(dupA) mice were analysed. Scale bars 5  $\mu$ m in b, 10  $\mu$ m in c.

Supplementary Figure 8

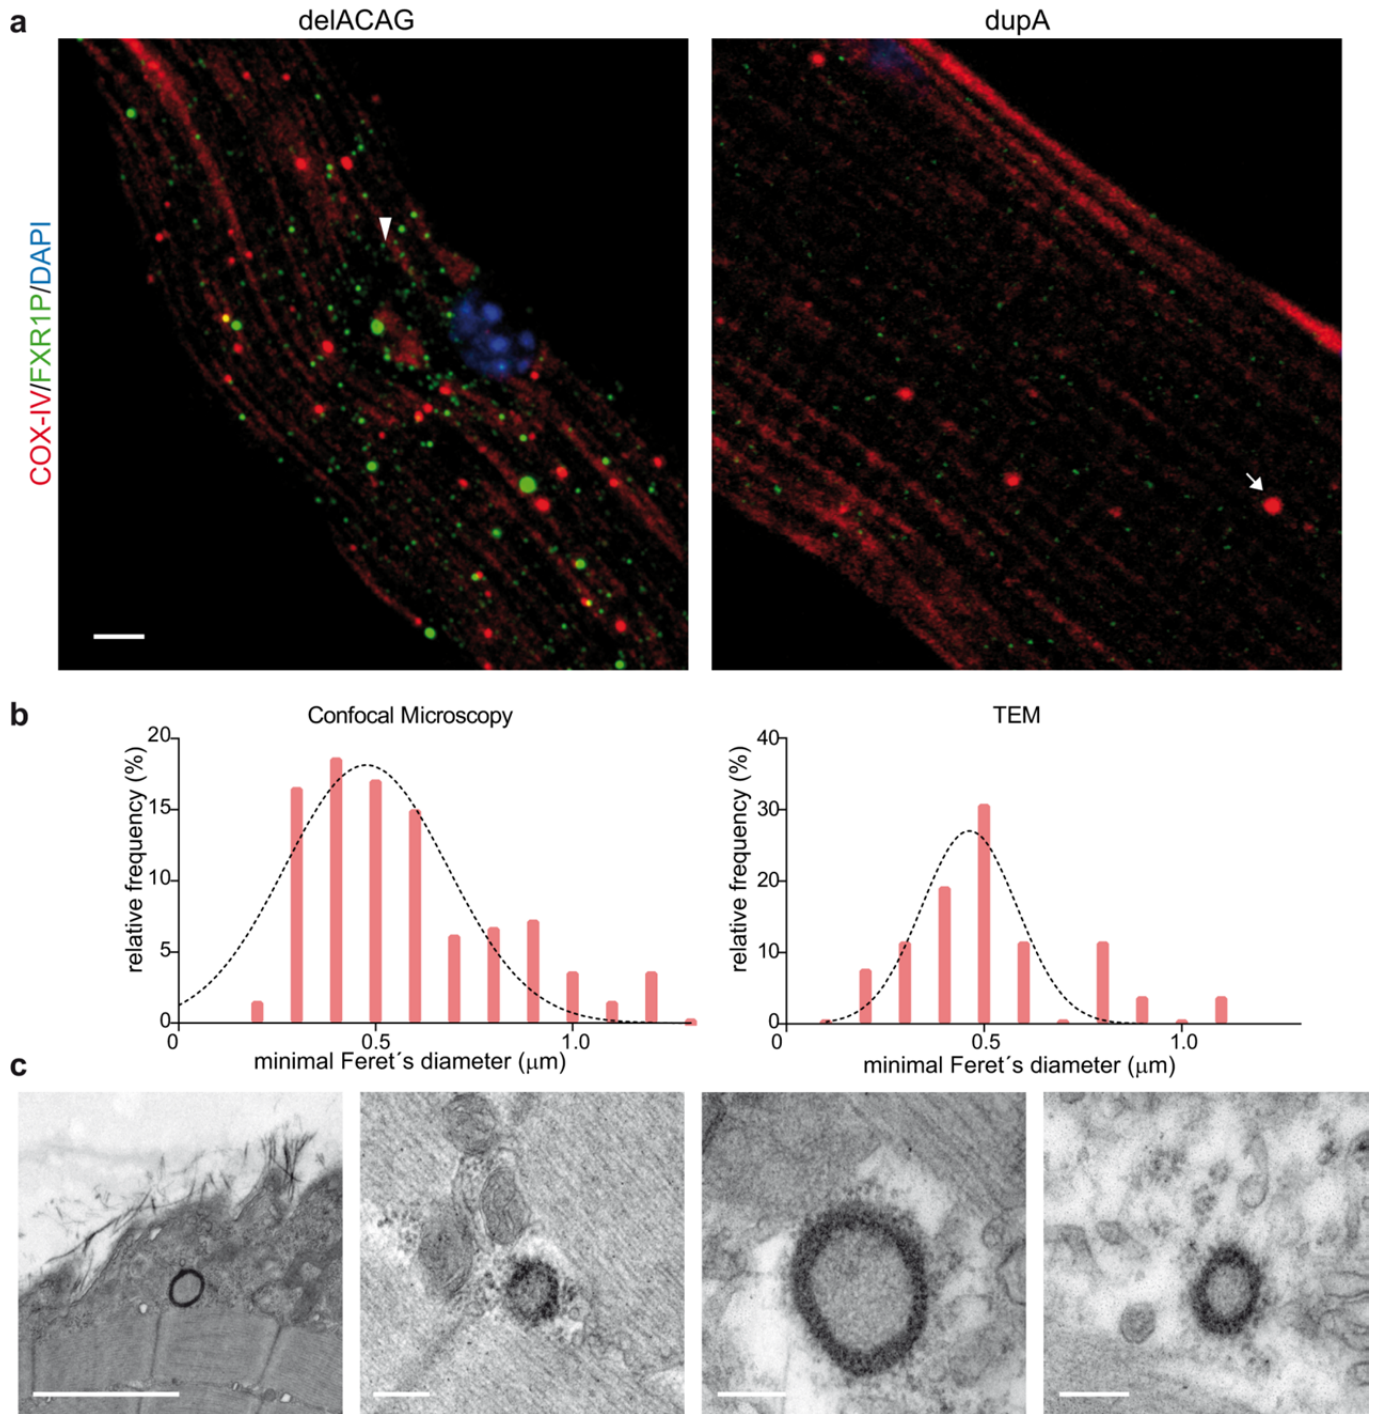

**Supplementary Figure 8. Subcellular localization studies of P82,84 variants in exon-15 mutant mice.** a) Maximum Z-project confocal co-immunofluorescence images of FXR1P (green) and COX-IV (red) in isolated EDL fibres from delACAG (left) and dupA (right) mice. Scale bar 5  $\mu\text{m}$ . The arrowhead in delACAG denotes a core lesion lacking COX-IV staining. The arrow in dupA indicates abnormal mitochondrial accumulation. Nuclei are stained with DAPI (blue). b) Quantitative size determination of granules detected by anti-FXR1P confocal microscopy (CF) (left histogram) and TEM (right histogram) in fibres from delACAG mice. The relative frequency of FXR1P granules within a specific length range (bin-range: 0.1  $\mu\text{m}$ ) of minimal Feret's diameter (X-axis) is represented in the Y-axis. Total number of granules analysed: n=193 (CF) and n=26 (TEM). c) Representative TEM images corresponding to ultrathin sections of gastrocnemius from heterozygous wt/delACAG mice showing normal sarcomere structure and ring-shaped cytoplasmic granules. Scale bars: 2  $\mu\text{m}$  left panel, 200 nm rest of panels.

Supplementary Figure 9

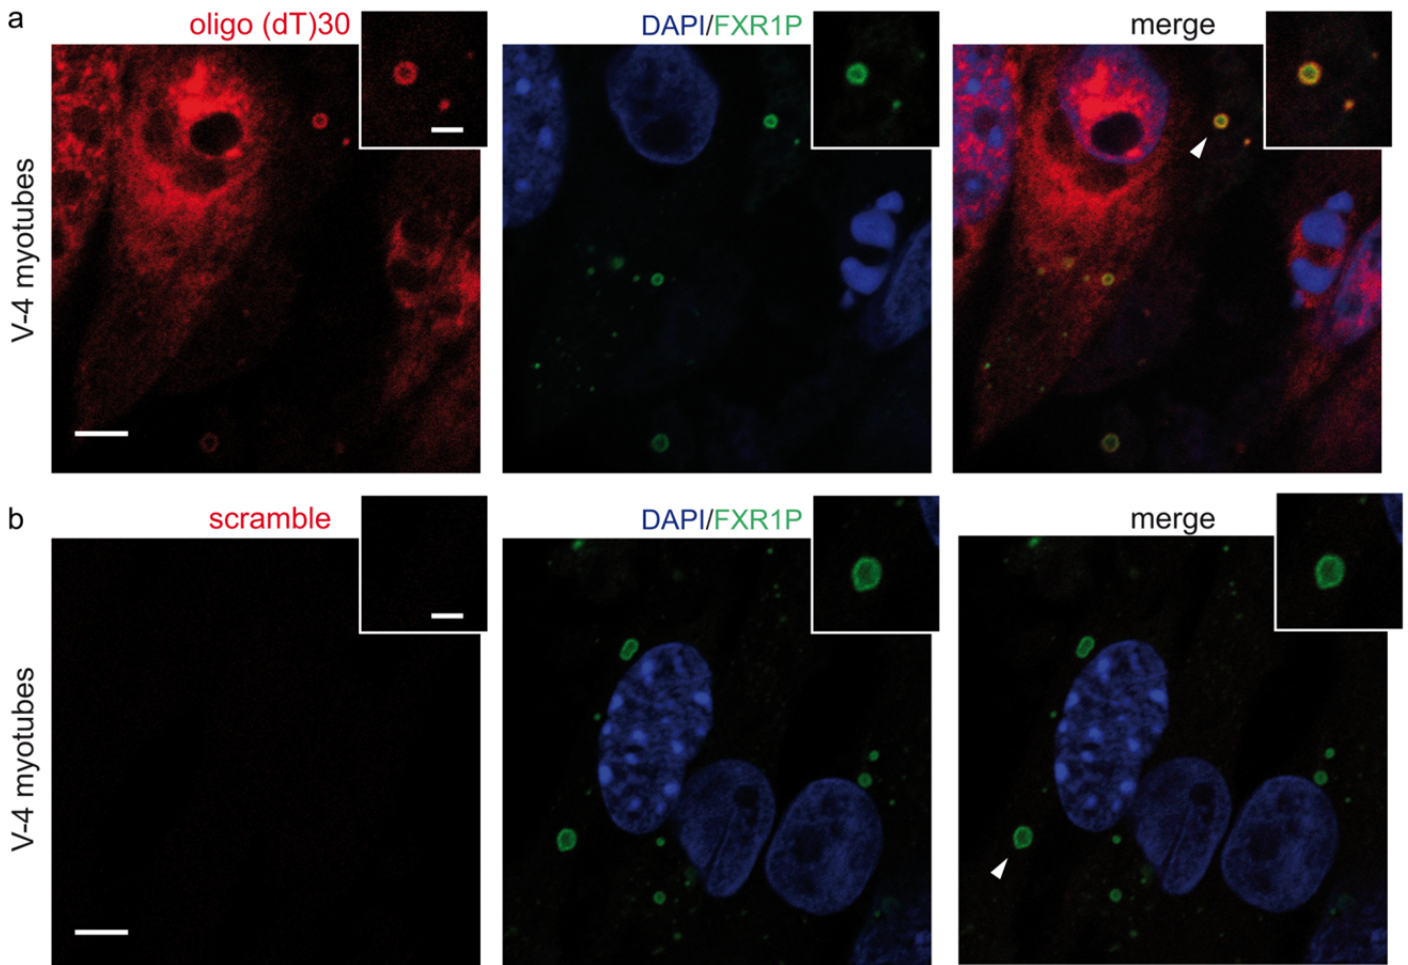

**Supplementary Figure 9. V-4 delACAG granules incorporate mRNA.** a-b) Confocal images (single Z-slice) of RNA-FISH performed in V-4 myotubes using Cy3-oligo(dT) (a) or a Cy3-scramble control probe (b) followed by anti-FXR1P immunostaining proving positive oligo (dT) signal in delACAG granules. Scale bars 5  $\mu\text{m}$ . Arrowheads mark the areas shown with higher magnification. Scale bar 2 $\mu\text{m}$ . Nuclei were stained with DAPI. Three technical replicates of this experiment were performed.



### Supplementary Figure 10

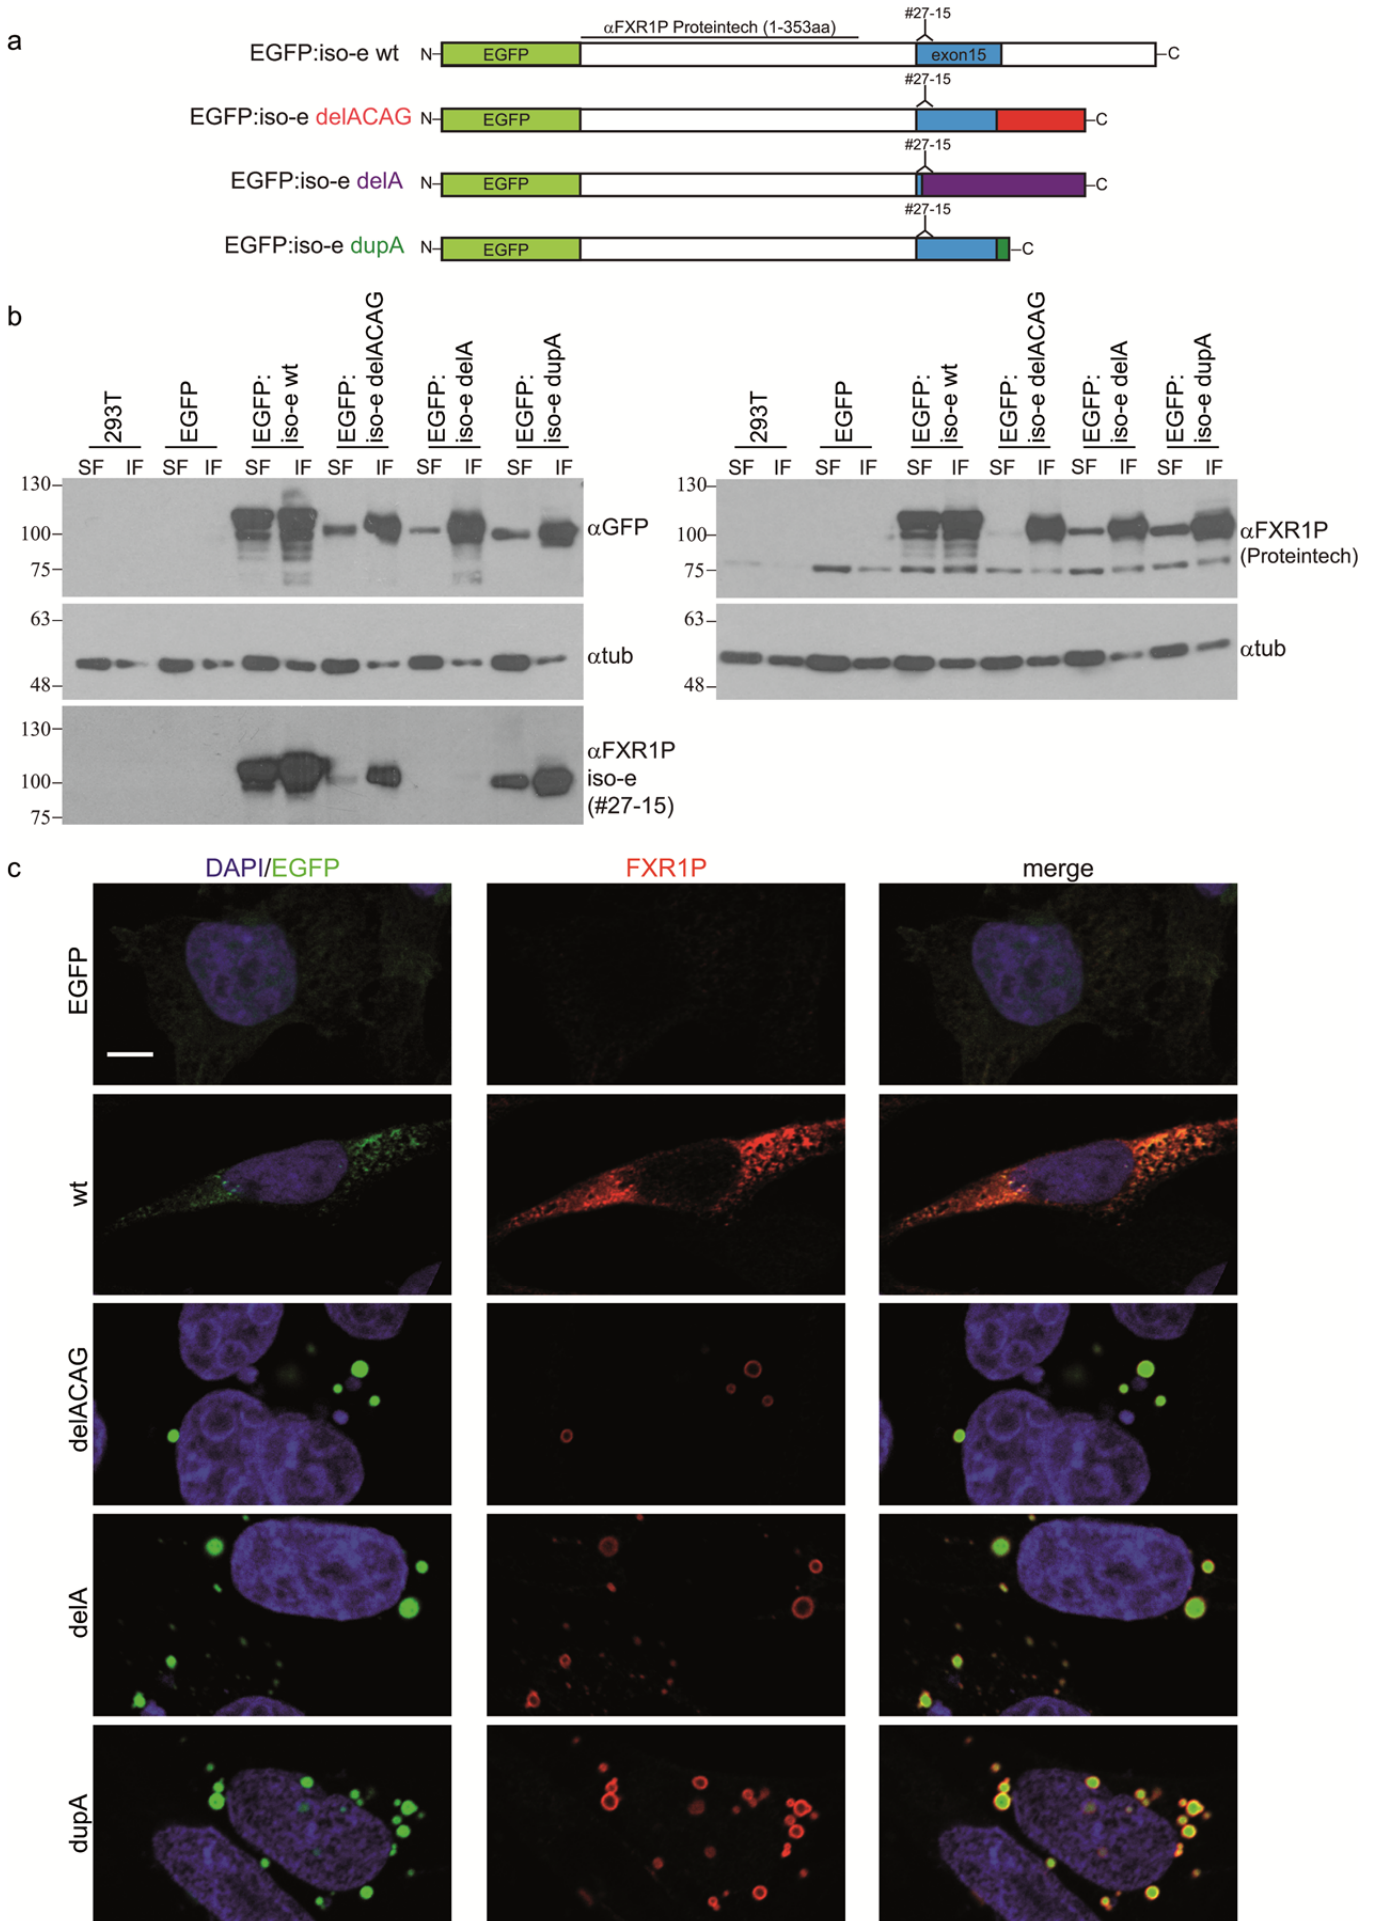

**Supplementary Figure 10. Mutant iso-e isoforms assemble in ring-shaped granules in HeLa cells.** a) Schematic representation of wild type and mutant EGFP:FXR1P-iso-e (human) fusion proteins showing exon-15 (blue box) and different C-terminal ends of the mutant proteins according to their respective mutations. Epitope position for Proteintech and #27-15 anti-FXR1P antibodies is indicated. b) Representative immunoblots from HEK293T protein extracts (soluble (SF) and insoluble (IF) fractions) demonstrating detection of the fusion proteins only in cells transfected with the EGFP:iso-e constructs indicated in a, but not in cells transfected with the empty pEGFP-C1 vector (EGFP), or in non-transfected cells (293T). Equally sized bands were identified by anti-FXR1P (Proteintech) raised against the N-terminal region of FXR1P (right panel) and by anti-GFP (left panel). The anti-GFP blot was stripped and reprobed with the exon-15 specific antibody #27-15 yielding an identical result except for EGFP:iso-e-delA (bottom left panel). The delA variant only includes the first 5 amino acids of the peptide used to generate #27-15<sup>1</sup>, and thus the corresponding fusion protein is not recognized by this antibody. In contrast, the full #27-15 immunogenic peptide is present in delACAG and dupA isoforms (Supplementary Fig. 1). Tubulin ( $\alpha$ tub) was used as loading control. n=2. c) Dual confocal image (single Z-slice) for EGFP and anti-FXR1P staining (Proteintech) corresponding to HeLa cells transfected with the EGFP empty vector (EGFP) or with the different EGFP:iso-e constructs indicated in panel a showing ring-shaped FXR1P granules in cells transfected with all three mutant variants. n=3. Scale bar 5  $\mu$ m. Nuclei are labelled with DAPI.

Supplementary Figure 11

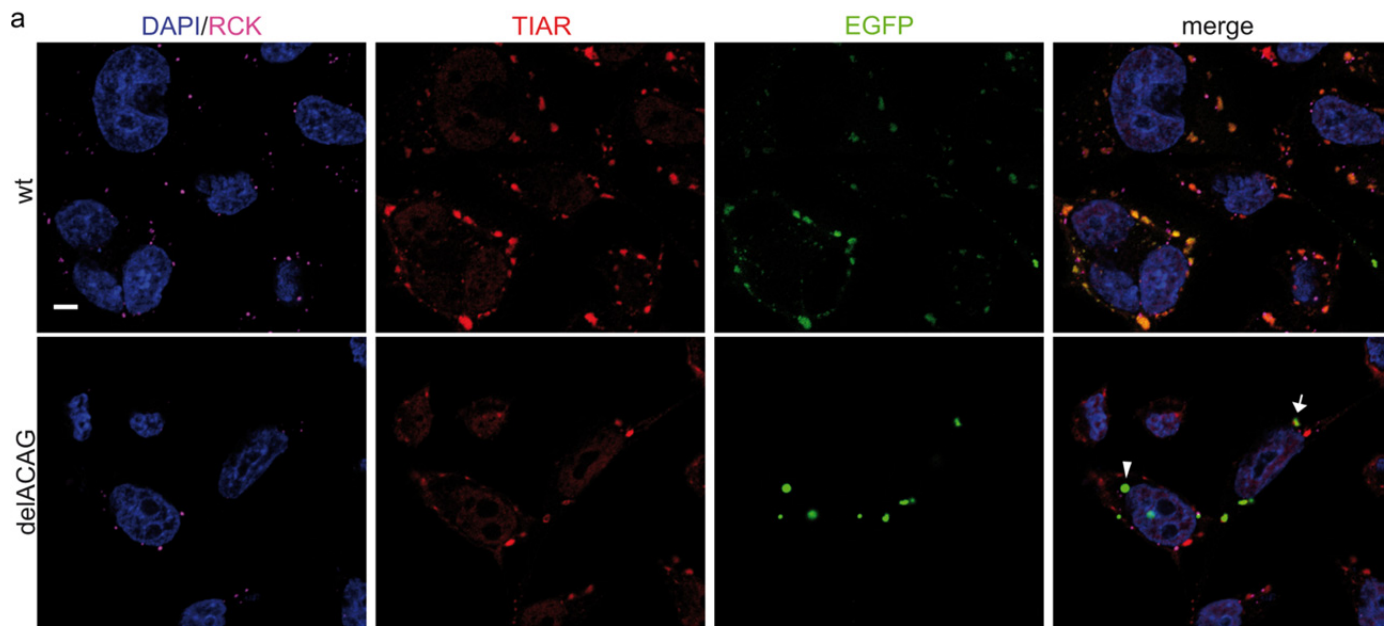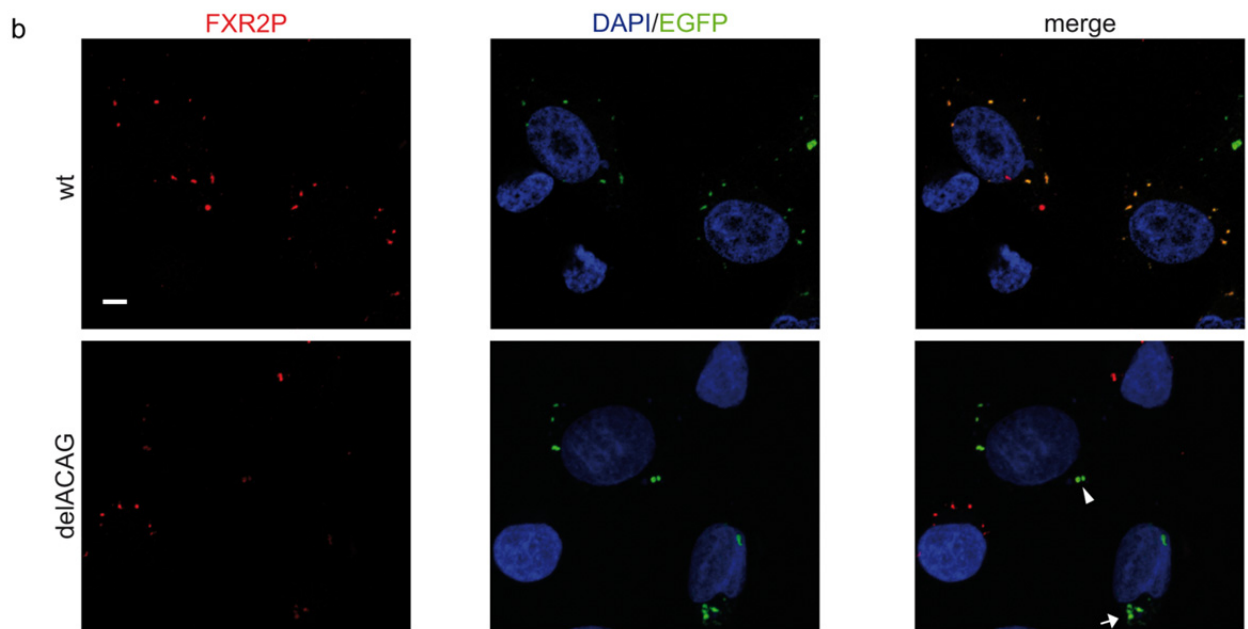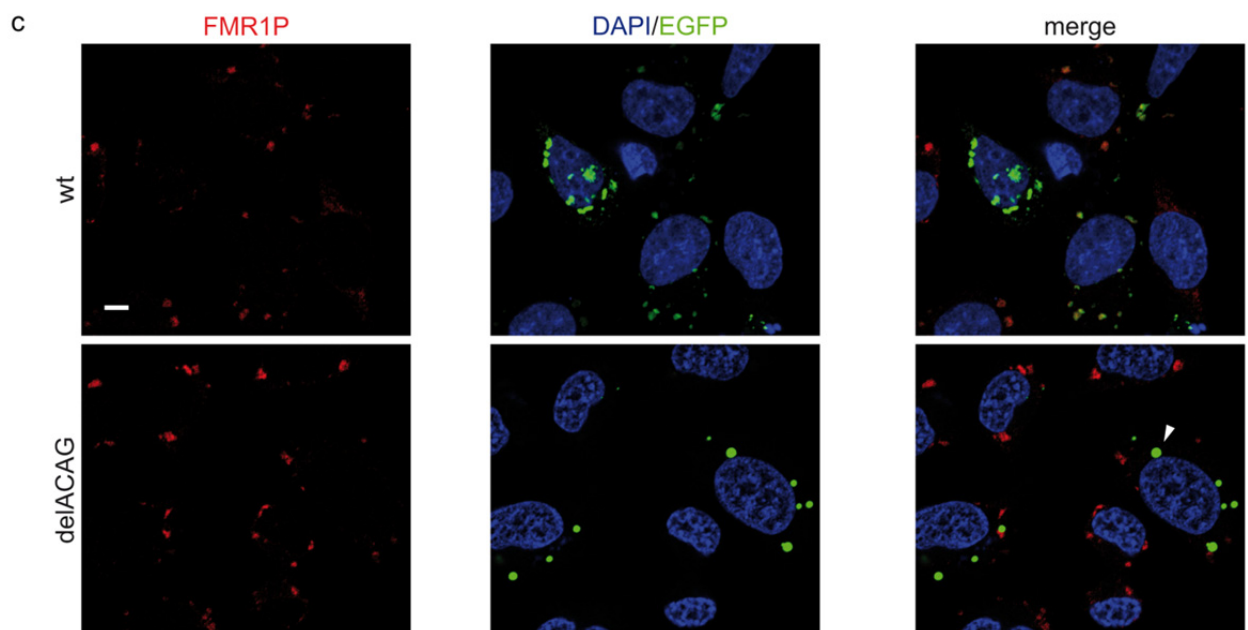



**Supplementary Figure 11. Ring-shaped delACAG granules generated in transfected HeLa cells do not actively recruit SG components.** a-c) Confocal immunofluorescence images (single Z-slice) of HeLa cells transfected with wt or delACAG EGFP:iso-e constructs, stressed with arsenite (ARS) and immunostained for the SG markers TIAR/RCK (a), FXR2P (b) or FMR1P (c). The EGFP signal from normal EGFP:iso-e-wt and mutant EGFP:iso-e-delACAG co-localizes with SG markers at morphologically irregular SGs (arrows), but there is no co-localization or weak co-localization (FXR2P, panel b) at delACAG ring-shaped granules (arrowheads). Equivalent results were obtained in HeLa cells transfected with EGFP:iso-e-delA or -dupA constructs. n=3. Scale bars 5  $\mu$ m. Nuclei are stained with DAPI.

Supplementary Figure 12

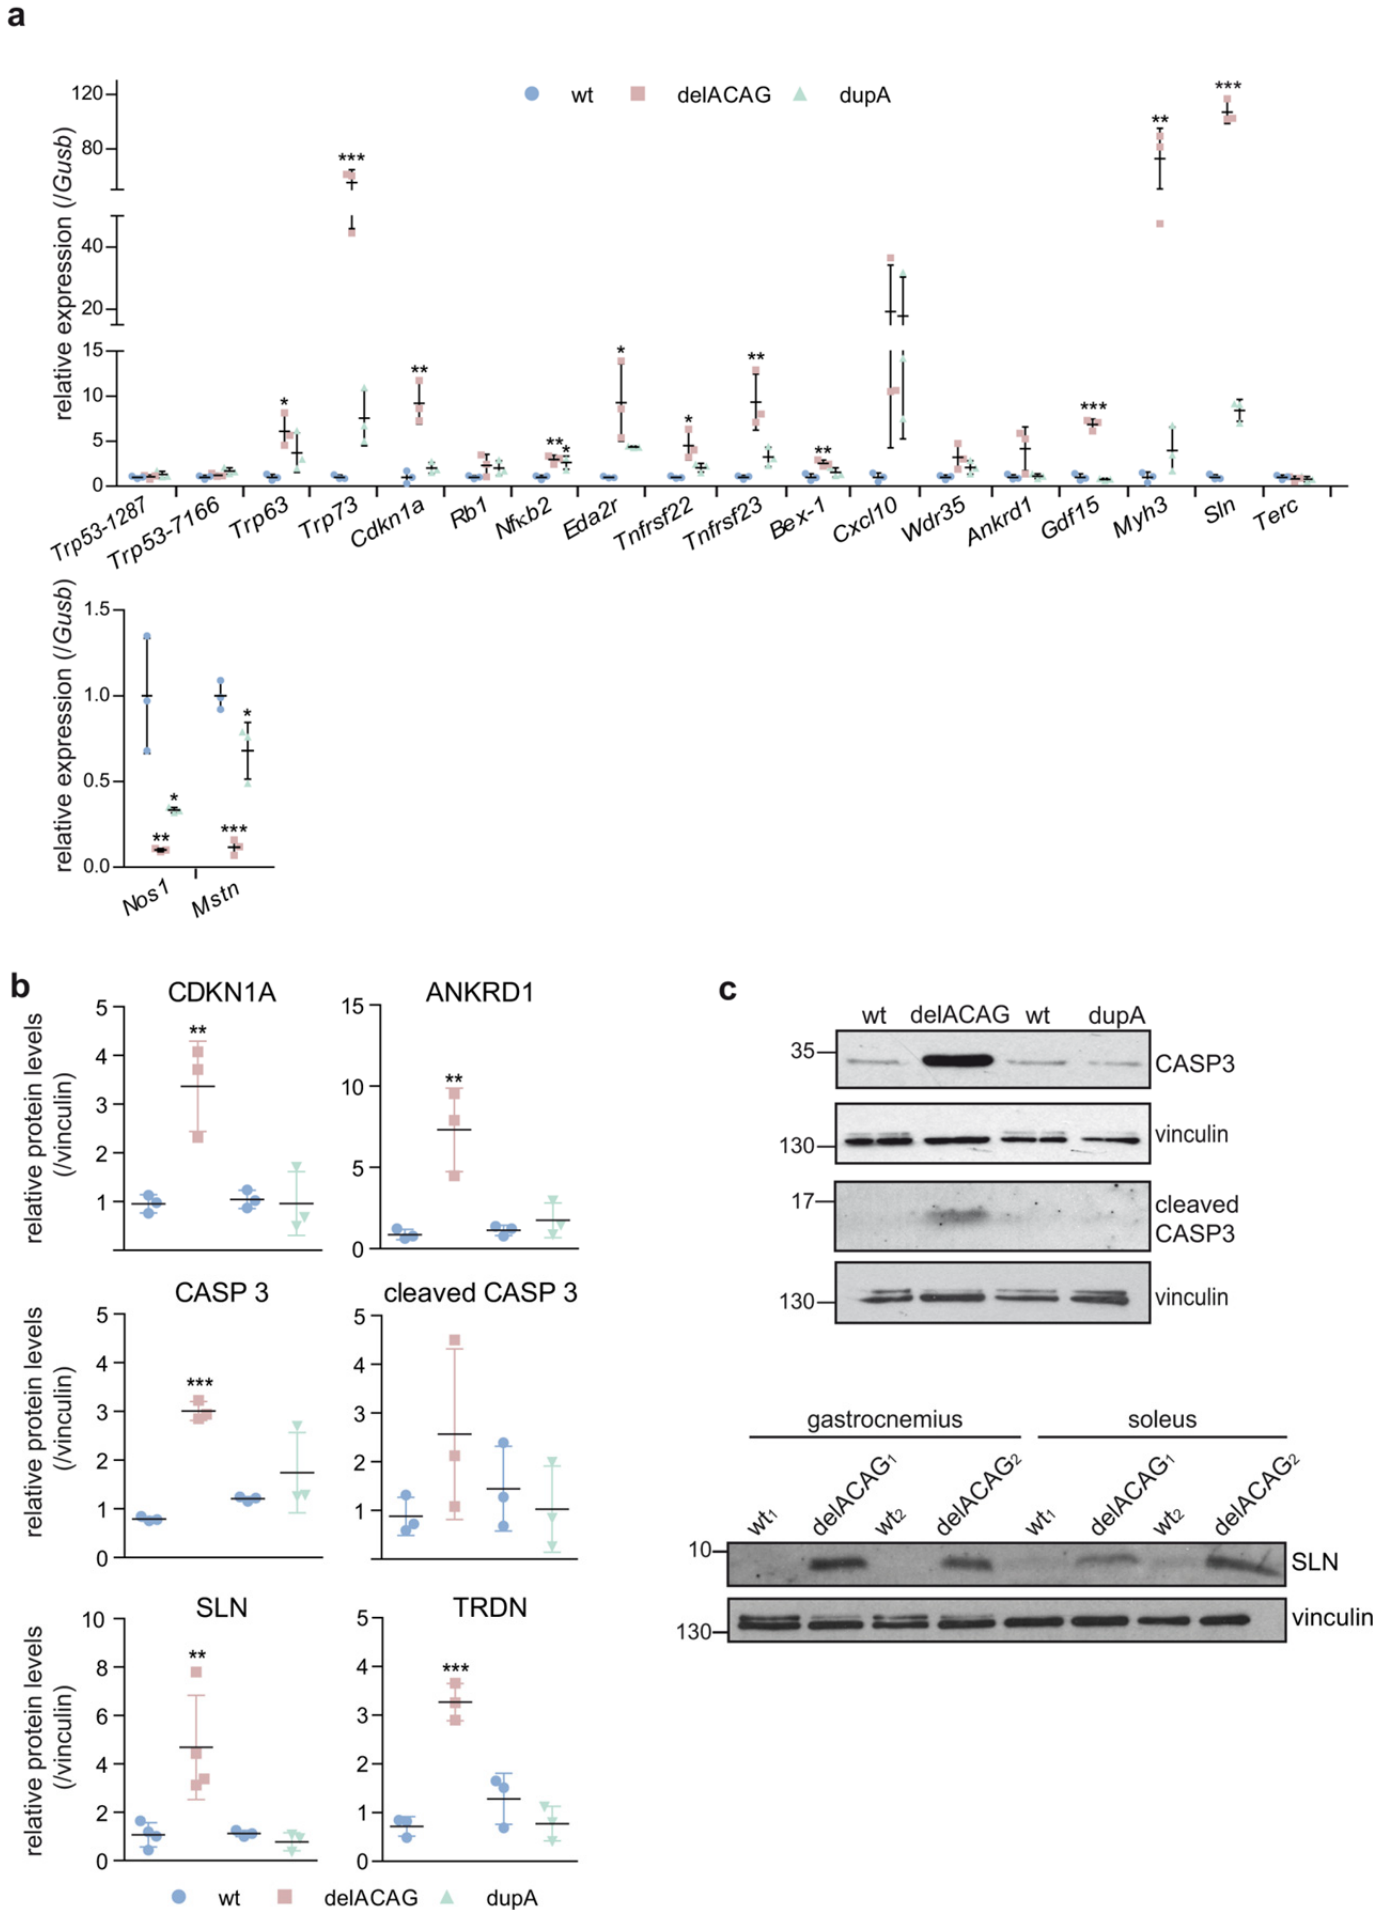

**Supplementary Figure 12. Gene expression analysis in skeletal muscle from exon-15 mutant mice.** a) Relative expression of selected DEGs by TaqMan qRT-PCR in gastrocnemius of wt, delACAG and dupA mice of 1.5 months of age using *Gusb* as the reference gene. Values are expressed as fold change of the mean value of wt mice. n=3. b) Quantification of CDKN1A, ANKRD1, CASP3, cleaved CASP3, SLN and TRDN protein levels in gastrocnemius (or soleus in the case of SLN) from delACAG, dupA mice and corresponding wt littermates determined by densitometry. Representative immunoblots are shown in Fig. 10 e-f. For each blot densitometric values were referred to vinculin and then normalized to the mean value of the total number of wt mice analysed within the same blot. n=7(wt), 4(delACAG), 3(dupA) for SLN and n=6(wt), 3(delACAG), 3(dupA) for the rest of proteins. Graphs in a-b represent mean  $\pm$  s.d. followed by one-way ANOVA with Tukey post-hoc test. c) Top panel: replicate blots from experiments shown in Fig. 10 e-f using extracts from different mice. Lower panel: Additional immunoblot demonstrating protein levels of SLN in soleus and gastrocnemius of two different wt and delACAG mouse pairs at P21. Vinculin is used as loading control.

Supplementary Figure 13

Figure 2a

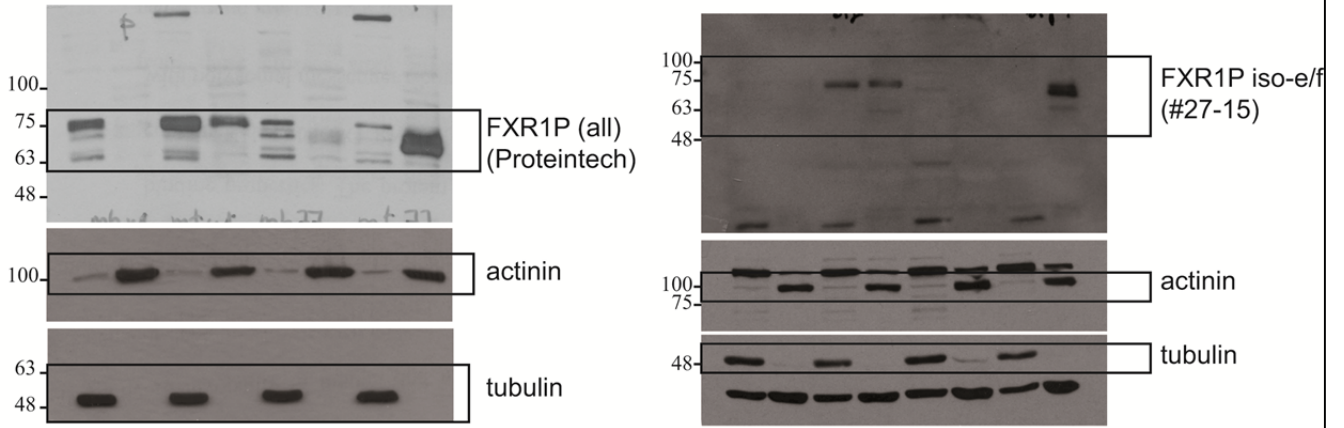

Figure 5b

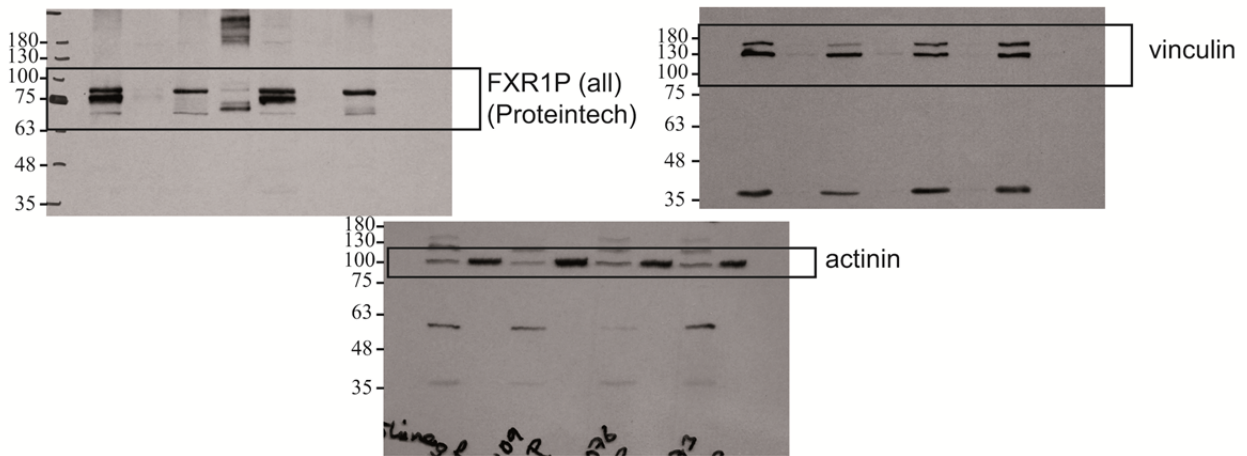

Figure 10e

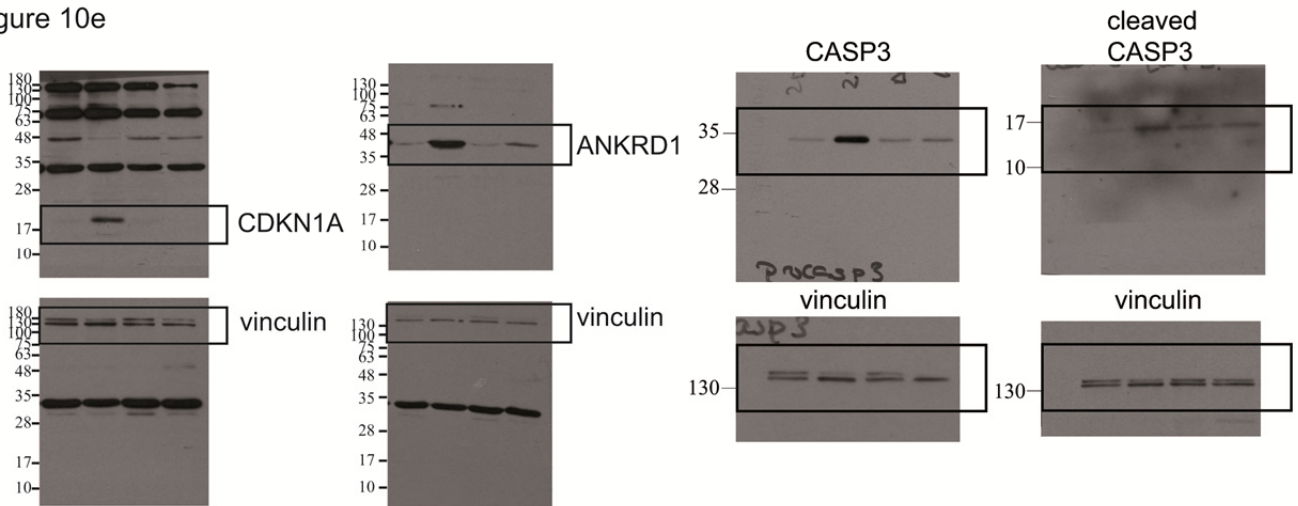

Figure 10f

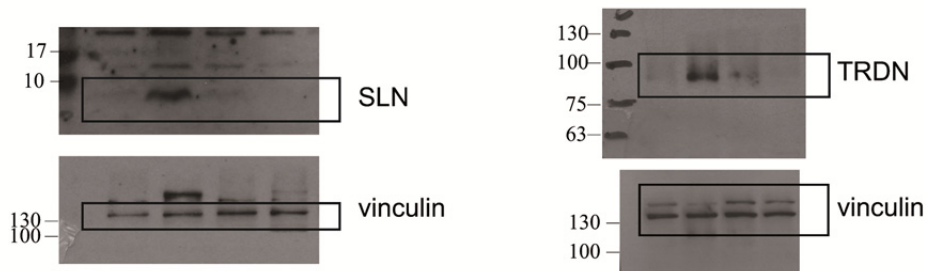

Supplementary Figure 3

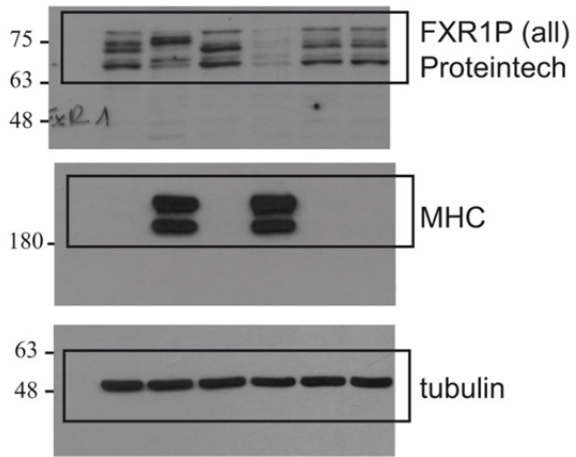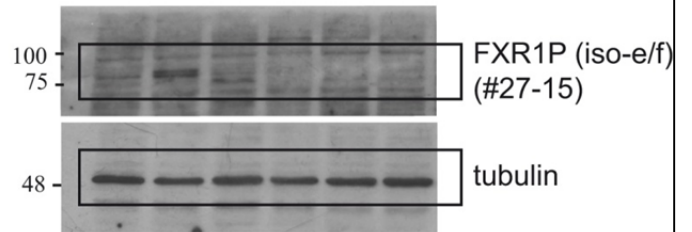

Supplementary Figure 4c

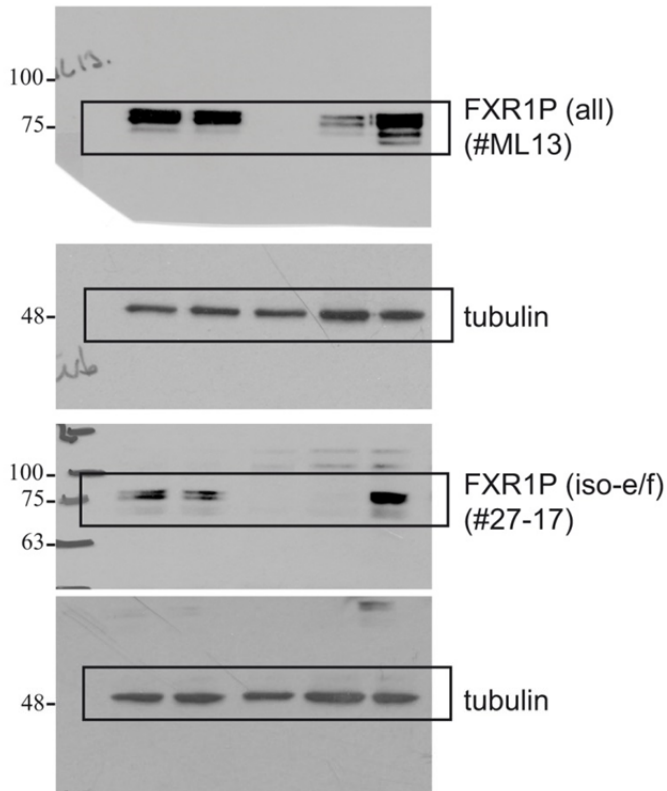

muscle

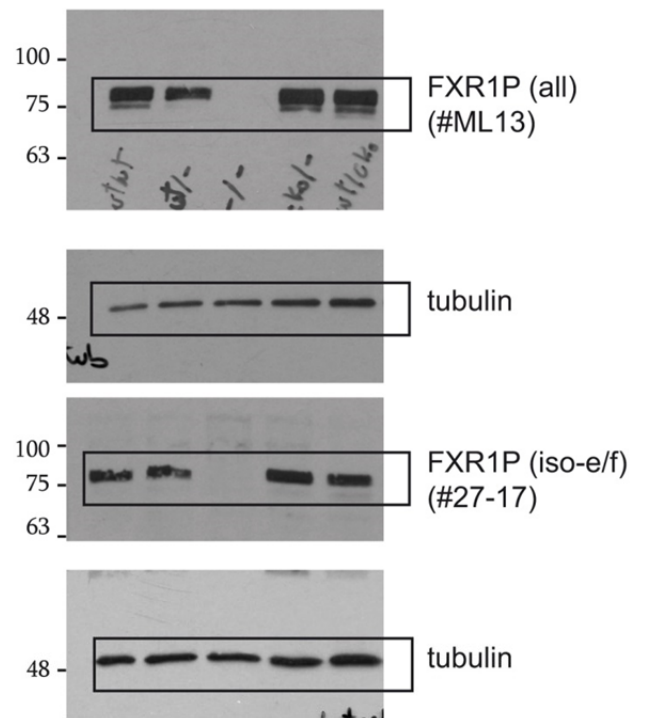

heart

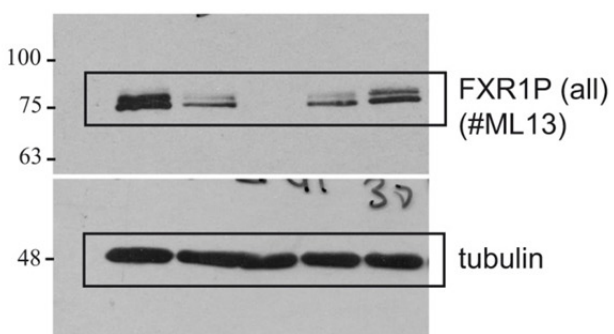

brain

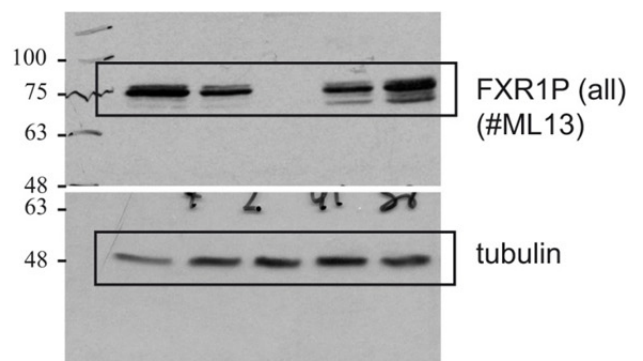

lung





**Supplementary Figure 13. Uncropped images of WBs.** Uncropped scan of immunoblots inserted in different figures and supplementary figures of this manuscript. For each panel the number of the corresponding figure is indicated. Black boxes mark cropped specific bands shown in figures.

## Supplementary Tables

### Supplementary Table 1a. Pipeline used to analyse NGS-data of the proband of family 1

| Filter                                                                                    | Number of variants |
|-------------------------------------------------------------------------------------------|--------------------|
| Numbers of variants called (coding and splice site variants, MAF $\leq$ 0.05 1000 G)      | 5,031              |
| Variant depth (Number of reads supporting the variant / Number of total reads) $\geq$ 0.2 | 3,802              |
| Variants with a MAF < 0.0001 (ENSEMBL release 75)                                         | 1,781              |
| Neither in our in-house variant database nor ExAC with MAF > 0.0001                       | 600                |
| Number of variants inside a ROH                                                           | 9                  |

MAF: Minor Allele Frequency; ExAC: Exome Aggregation Consortium database; ROH: Regions of homozygosity.

### Supplementary Table 1b. Candidate variants inside ROH identified in the proband of family 1

| Chromosome | Position  | Ref    | Alt | Gene            | Protein Effect | Ensembl protein ID | Polyphen Prediction | OMIM                 |
|------------|-----------|--------|-----|-----------------|----------------|--------------------|---------------------|----------------------|
| 3          | 180688933 | TAGAC* | T   | <i>FXR1</i>     | R559Sfs*37     | ENSP00000418097.1  | N.P.                |                      |
| 11         | 123887188 | G      | C   | <i>OR10G4</i>   | D303H          | ENSP00000325076.3  | BENIGN              |                      |
| 15         | 40849476  | G      | A   | <i>C15ORF57</i> | R114W          | ENSP00000453429.1  | PROB DAMAGING       |                      |
| 15         | 42744067  | G      | C   | <i>ZNF106</i>   | Q112E          | ENSP00000263805.4  | BENIGN              |                      |
| 15         | 44856848  | T      | C   | <i>SPG11**</i>  | I2350V         | ENSP00000261866.7  | BENIGN              | 602099,616668,604360 |
| 20         | 30513704  | G      | A   | <i>TTLL9</i>    | R172Q          | ENSP00000365086.2  | POSS DAMAGING       |                      |
| 20         | 39980524  | T      | A   | <i>LPIN3</i>    | L389Q          | ENSP00000362354.3  | PROB DAMAGING       |                      |
| 22         | 51041662  | C      | G   | <i>MAPK8IP2</i> | S61C           | ENSP00000330572.3  | BENIGN              |                      |
| X          | 138827973 | A      | G   | <i>ATP11C</i>   | Y961H          | ENSP00000332756.3  | BENIGN              |                      |

Chromosome positions are referred to GRCh37/hg19 assembly. Reference (Ref) and alternative (Alt) alleles are indicated. Polyphen was used to predict the protein effect of each variant. N.P.: not predicted; PROB: Probably; POSS: Possibly. (\*) Following the HGVS nomenclature guidelines the correct name of this variant at the cDNA level is: XM\_005247813.3: c.1764\_1767delACAG and XM\_005247815.3: c.1677\_1680delACAG for isoforms e and f respectively. (\*\*\*) The homozygous missense change p.I2350V (gnomAD allele frequency: 2.438e-5) in the spastic paraplegia gene *SPG11*, classed as benign by Polyphen, was not present in V-4 after Sanger sequencing and thus was disregarded as the cause of the disease in family 1. Consistently, *SPG11* was not detected inside a ROH in V-4 (Supplementary Fig. 2a).

#### Databases of genetic variants (supplementary note 1 for acknowledgements):

dbSNP: <http://www.ncbi.nlm.nih.gov/projects/SNP/>

ExAC (Exome Aggregation Consortium)<sup>4</sup>: <http://exac.broadinstitute.org/>

ESP (Exome Variant Server, NHLBI GO Exome Sequencing Project (ESP), Seattle, WA): <http://evs.gs.washington.edu/EVS/> [April, 2017 accessed]

1000 G (1000 Genomes Project)<sup>5</sup>: <http://www.internationalgenome.org/home>

gnomAD (Genome Aggregation Database)<sup>4</sup>: <http://gnomad.broadinstitute.org/>

Kaviar (~Known VARIants)<sup>6</sup> <http://db.systemsbiology.net/kaviar/>

**Supplementary Table 2. Variants in multi-minicore genes (MAF<0.1) for family 1 and family 2**

| Chr                                          | Position  | Ref | Alt | Gene          | Zygoty       | Protein | Ref Seq                      | rs#               | ExAC (MAF)                              | ClinVar                  |                          |
|----------------------------------------------|-----------|-----|-----|---------------|--------------|---------|------------------------------|-------------------|-----------------------------------------|--------------------------|--------------------------|
| <b>FAMILY 1</b>                              |           |     |     |               |              |         |                              |                   |                                         |                          |                          |
| <b>Shared by V-4 (parental inheritance)</b>  |           |     |     |               |              |         |                              |                   |                                         |                          |                          |
| <b>Recessive Minicore Genes</b>              |           |     |     |               |              |         |                              |                   |                                         |                          |                          |
| 2                                            | 179401845 | A   | G   | <i>TTN</i>    | Heterozygous | C33331R | ENSP00000467141.1            | <i>rs56061641</i> | G=0.0003                                | Benign/Likely Benign/VUS |                          |
| 2                                            | 179418892 | G   | A   | <i>TTN</i>    | Heterozygous | S29649L | No (paternal)                | ENSP00000467141.1 | <i>rs764695663</i>                      | A=0.00003                | VUS                      |
| 2                                            | 179441707 | G   | A   | <i>TTN</i>    | Heterozygous | H23119Y | Yes, heterozygous (maternal) | ENSP00000467141.1 | -                                       | -                        | -                        |
| 2                                            | 179477267 | T   | G   | <i>TTN</i>    | Heterozygous | N16662T |                              | ENSP00000467141.1 | <i>rs36043230</i>                       | G=0.0160                 | Benign/Likely benign     |
| 2                                            | 179578713 | T   | C   | <i>TTN</i>    | Heterozygous | N8891S  |                              | ENSP00000467141.1 | <i>rs146057575</i>                      | C=0.0004                 | Benign/Likely Benign/VUS |
| 12                                           | 121176113 | A   | T   | <i>ACADS</i>  | Heterozygous | T219S   |                              | ENSP00000242592.4 | <i>rs144815059</i>                      | T=0.0002                 | -                        |
| 19                                           | 38931451  | G   | A   | <i>RYRI</i>   | Heterozygous | A38T    | No (paternal)                | ENSP00000347667.3 | <i>rs377558801</i>                      | A=0.00004                | VUS                      |
| 19                                           | 38976655  | C   | T   | <i>RYRI</i>   | Heterozygous | P1787L  |                              | ENSP00000347667.3 | <i>rs34934920</i>                       | T=0.0196                 | Benign/Likely benign     |
| 19                                           | 38983180  | G   | T   | <i>RYRI</i>   | Heterozygous | G2060C  |                              | ENSP00000347667.3 | <i>rs35364374</i>                       | T=0.0694                 | Benign                   |
| <b>Dominant Minicore Genes</b>               |           |     |     |               |              |         |                              |                   |                                         |                          |                          |
| 16                                           | 772990    | C   | G   | <i>CCDC78</i> | Heterozygous | W410S   | Yes, heterozygous (maternal) | ENSP00000293889.6 | <i>rs893572894</i> (multiallelic C/T/G) | T (W>Ter) =0.00003       | -                        |
| <b>FAMILY 2</b>                              |           |     |     |               |              |         |                              |                   |                                         |                          |                          |
| <b>Shared by all sibs (II-3, II-4, II-5)</b> |           |     |     |               |              |         |                              |                   |                                         |                          |                          |
| <b>Recessive Minicore Genes</b>              |           |     |     |               |              |         |                              |                   |                                         |                          |                          |
| 19                                           | 38976655  | C   | T   | <i>RYRI</i>   | Heterozygous | P1787L  | Yes, heterozygous            | NM_000540.2       | <i>rs34934920</i>                       | T=0.0196                 | Benign/Likely benign     |
| 2                                            | 179403750 | C   | T   | <i>TTN</i>    | Heterozygous | R31330H | No                           | NM_001256850.1    | <i>rs4894028</i>                        | T=0.0680                 | Benign/Likely benign     |
| 2                                            | 179414162 | T   | C   | <i>TTN</i>    | Heterozygous | I29090V | No                           | NM_001256850.1    | <i>rs16866391</i>                       | C=0.0313                 | -                        |
| 2                                            | 179473201 | G   | A   | <i>TTN</i>    | Heterozygous | P15829L | No                           | NM_001256850.1    | <i>rs372618781</i> (multiallelic A/G/T) | T(P>Q) =0.00003          | (T) Benign/VUS           |
| 2                                            | 179497018 | G   | A   | <i>TTN</i>    | Heterozygous | R12894C | No                           | NM_001256850.1    | <i>rs12471771</i> (multiallelic A/G/T)  | A(R>C) =0.0210           | Benign/Likely benign     |
| 2                                            | 179510739 | A   | G   | <i>TTN</i>    | Heterozygous | V11798A | No                           | NM_001256850.1    | -                                       | -                        | -                        |
| 2                                            | 179589241 | G   | A   | <i>TTN</i>    | Heterozygous | A6637V  | No                           | NM_001256850.1    | <i>rs17355446</i>                       | A=0.0511                 | Benign/Likely benign     |

WES variants in previously reported recessive and dominant multi-minicore genes in the proband of family 1 and patients from family 2 (MAF<0.1). Variants classed as VUS (variant of unknown significance), or with no definition in ClinVar (NCBI), and particularly rare (MAF<0.01%) were analysed by Sanger sequencing in all members of family 1. One *TTN* variant (H23119Y) and the W410S variant in *CCDC78* were detected in the heterozygous state in both V-4 and the unaffected mother. The *CCDC78* variant involves a non-conservative amino acid, is multiallelic with one of the alleles resulting in W410Stop (MAF=0.00003), and relevantly, was also present in the unaffected mother. Moreover, this variant is classed as synonymous when a different reference sequence is used (*rs893572894*, dbSNP database (NCBI)). Chr: chromosome, Ref: reference allele, Alt: altered allele, Ref Seq: Reference sequence, rs#: variant identification number, ExAC (MAF): Minor Allele frequency in ExAC, ClinVar: Clinical Significance in ClinVar database (NCBI). For multiallelic variants MAF of one allele is indicated.

**Supplementary Table 3a. Gene Ontology (GO) functional enrichment analysis of selected DEGs (differentially expressed genes)**

| ID         | Description                                            | GeneRatio | BgRatio   | pvalue | p.adjust | geneID                                                                                      | Count |
|------------|--------------------------------------------------------|-----------|-----------|--------|----------|---------------------------------------------------------------------------------------------|-------|
| GO:0072331 | signal transduction by p53 class mediator              | 10/217    | 125/20428 | 9E-07  | 0.002    | Ankrd1/Bbc3/Cdkn1a/Eda2r/Mdm2/Phlda3/Smyd2/Trp63/Trp73/Zfp385a                              | 10    |
| GO:0042770 | signal transduction in response to DNA damage          | 7/217     | 73/20428  | 1E-05  | 0.006    | Ankrd1/Cdkn1a/Mdm2/Smyd2/Trp63/Trp73/Zfp385a                                                | 7     |
| GO:0044057 | regulation of system process                           | 17/217    | 483/20428 | 2E-05  | 0.007    | Adrb1/Camk2d/Cck/Cx3cl1/Dbh/Gas6/Inh1a/Kcnh2/Kcnn2/Mdm2/Mstn/Myl4/Nos1/Rapgef4/Slr4/Tmem100 | 17    |
| GO:0001836 | release of cytochrome c from mitochondria              | 6/217     | 57/20428  | 3E-05  | 0.009    | Bbc3/Cck/Mmp9/Sfn/Trp73/Wdr35                                                               | 6     |
| GO:0097193 | intrinsic apoptotic signaling pathway                  | 12/217    | 274/20428 | 4E-05  | 0.01     | Bbc3/Casp3/Cdkn1a/Eda2r/Mdm2/Mmp9/Phlda3/Scn2a/Sfn/Trp63/Trp73/Zfp385a                      | 12    |
| GO:2001233 | regulation of apoptotic signaling pathway              | 14/217    | 382/20428 | 6E-05  | 0.012    | Atf3/Bbc3/Cx3cl1/Dbh/Gdnf/Mdm2/Mmp9/Tnfrsf22/Tnfrsf23/Trp63/Trp73/Wdr35/Wnt4/Zfp385a        | 14    |
| GO:0044819 | mitotic G1/S transition checkpoint                     | 4/217     | 21/20428  | 6E-05  | 0.012    | Cdkn1a/Mdm2/Trp63/Trp73                                                                     | 4     |
| GO:0071214 | cellular response to abiotic stimulus                  | 10/217    | 211/20428 | 9E-05  | 0.012    | Ankrd1/Bbc3/Cdkn1a/Cers1/Mdm2/Nos1/Scn2a/Trp63/Trp73/Wnt11                                  | 10    |
| GO:0008015 | blood circulation                                      | 15/217    | 444/20428 | 9E-05  | 0.013    | Acta2/Actc1/Adrb1/Alox12/Camk2d/Cx3cl1/Dbh/Gas6/Kcnh2/Kcnn2/Mdm2/Myl4/Nav2/Nos1/Wdr35       | 15    |
| GO:0048485 | sympathetic nervous system development                 | 4/217     | 23/20428  | 9E-05  | 0.013    | Gdnf/Plxna4/Sox11/Trp63                                                                     | 4     |
| GO:0001508 | action potential                                       | 8/217     | 136/20428 | 1E-04  | 0.013    | Camk2d/Gria1/Kcnb1/Kcnh2/Kcnn2/Rapgef4/Scn2a/Scn3a                                          | 8     |
| GO:0052646 | alditol phosphate metabolic process                    | 3/217     | 10/20428  | 1E-04  | 0.015    | Gpd1/Gpd2/Slc37a2                                                                           | 3     |
| GO:0048483 | autonomic nervous system development                   | 5/217     | 47/20428  | 1E-04  | 0.015    | Gdnf/Nav2/Plxna4/Sox11/Trp63                                                                | 5     |
| GO:0043491 | protein kinase B signaling                             | 8/217     | 156/20428 | 3E-04  | 0.024    | AI464131/Cd28/Gas6/Mstn/Phlda3/Rras/Sesn3/Tmem100                                           | 8     |
| GO:0030858 | positive regulation of epithelial cell differentiation | 5/217     | 57/20428  | 3E-04  | 0.028    | Alox12/Foxj1/Gdnf/Sfn/Tmem100                                                               | 5     |
| GO:0060537 | muscle tissue development                              | 13/217    | 408/20428 | 4E-04  | 0.033    | Actc1/Adrb1/AI464131/Ankrd1/Atf3/Camk2d/Kcnh2/Klf5/Mstn/Rb1/Sox11/Trp63/Trp73               | 13    |
| GO:0051899 | membrane depolarization                                | 6/217     | 92/20428  | 4E-04  | 0.033    | Alox12/Camk2d/Cck/Kcnh2/Scn2a/Scn3a                                                         | 6     |
| GO:0007599 | hemostasis                                             | 8/217     | 176/20428 | 6E-04  | 0.04     | Alox12/Anxa8/Cx3cl1/Gas6/Myl9/Rab27a/Tlr4/Zfp385a                                           | 8     |
| GO:0034764 | positive regulation of transmembrane transport         | 7/217     | 135/20428 | 6E-04  | 0.04     | Adrb1/Car2/Cxcl10/Kcnh2/Nos1/Slc34a1/Wnk2                                                   | 7     |
| GO:0006936 | muscle contraction                                     | 10/217    | 271/20428 | 7E-04  | 0.042    | Acta2/Actc1/Adrb1/Camk2d/Gdnf/Kcnh2/Kcnn2/Myh3/Myl4/Nos1                                    | 10    |
| GO:0046827 | positive regulation of protein export from nucleus     | 3/217     | 17/20428  | 7E-04  | 0.043    | Gas6/Mdm2/Sfn                                                                               | 3     |
| GO:0032715 | negative regulation of interleukin-6 production        | 4/217     | 43/20428  | 0.001  | 0.058    | Foxj1/Gas6/Nlr3/Tlr4                                                                        | 4     |
| GO:0042692 | muscle cell differentiation                            | 12/217    | 399/20428 | 0.001  | 0.058    | Actc1/Adrb1/AI464131/Ankrd1/Camk2d/Cxcl10/Gdf15/Krt8/Lmod2/Mstn/Rb1/Wnt4                    | 12    |
| GO:0019228 | neuronal action potential                              | 4/217     | 45/20428  | 0.001  | 0.058    | Gria1/Rapgef4/Scn2a/Scn3a                                                                   | 4     |
| GO:0048486 | parasympathetic nervous system development             | 3/217     | 21/20428  | 0.001  | 0.058    | Gdnf/Nav2/Plxna4                                                                            | 3     |
| GO:0003015 | heart process                                          | 8/217     | 200/20428 | 0.001  | 0.058    | Actc1/Adrb1/Camk2d/Kcnh2/Kcnn2/Mdm2/Myl4/Nos1                                               | 8     |
| GO:0035914 | skeletal muscle cell differentiation                   | 5/217     | 73/20428  | 0.001  | 0.058    | Ankrd1/Atf3/Klf5/Rb1/Sox11                                                                  | 5     |
| GO:0070252 | actin-mediated cell contraction                        | 5/217     | 77/20428  | 0.001  | 0.058    | Actc1/Adrb1/Camk2d/Kcnh2/Kcnn2                                                              | 5     |

GO terms ordered by pvalue. Only GO terms with count  $\geq 4$  are represented in Fig. 10c.

### Supplementary Table 3b. KEGG enrichment analysis of selected DEGs

| ID       | Description             | GeneRatio | BgRatio  | pvalue      | p.adjust    | qvalue      | geneID                                                   | Count |
|----------|-------------------------|-----------|----------|-------------|-------------|-------------|----------------------------------------------------------|-------|
| mmu04115 | p53 signaling pathway   | 7/89      | 67/7758  | 1,02539E-05 | 0,001999505 | 0,001716175 | Bbc3/Casp3/Cdkn1a/Mdm2/Sesn3/Sfn/Trp73                   | 7     |
| mmu05205 | Proteoglycans in cancer | 10/89     | 201/7758 | 9,32578E-05 | 0,009092634 | 0,007804204 | Camk2d/Casp3/Cdkn1a/Fzd10/Mdm2/Mmp9/Rras/Tlr4/Wnt11/Wnt4 | 10    |

### Supplementary note 1. Acknowledgements

The authors would like to thank:

The Exome Aggregation Consortium and the groups that provided exome variant data for comparison. A full list of contributing groups can be found at <http://exac.broadinstitute.org/about>.

The NHLBI GO Exome Sequencing Project and its ongoing studies which produced and provided exome variant calls for comparison: the Lung GO Sequencing Project (HL-102923), the WHI Sequencing Project (HL-102924), the Broad GO Sequencing Project (HL-102925), the Seattle GO Sequencing Project (HL-102926) and the Heart GO Sequencing Project (HL-103010).

The 1000 Genomes Project and the groups that provided exome variant data for comparison.

The Genome Aggregation Database (gnomAD) and the groups that provided exome and genome variant data to this resource. A full list of contributing groups can be found at <http://gnomad.broadinstitute.org/about>.

The creators of Kaviar for providing a useful tool for comparing variant data.

### Supplementary References

1. Dube, M., Huot, M.E. & Khandjian, E.W. Muscle specific fragile X related protein 1 isoforms are sequestered in the nucleus of undifferentiated myoblast. *BMC Genet.* **1**, 4 (2000).
2. Kirkpatrick, L.L., McIlwain, K.A. & Nelson, D.L. Alternative splicing in the murine and human FXR1 genes. *Genomics* **59**, 193-202 (1999).
3. Nagy, E. & Maquat, L.E. A rule for termination-codon position within intron-containing genes: when nonsense affects RNA abundance. *Trends Biochem. Sci.* **23**, 198-199 (1998).
4. Lek, M., *et al.* Analysis of protein-coding genetic variation in 60,706 humans. *Nature* **536**, 285-291 (2016).
5. Genomes Project, C., *et al.* A global reference for human genetic variation. *Nature* **526**, 68-74 (2015).
6. Glusman, G., Caballero, J., Mauldin, D.E., Hood, L. & Roach, J.C. Kaviar: an accessible system for testing SNV novelty. *Bioinformatics* **27**, 3216-3217 (2011).
